# Supplementary material for: Nasogastric/Nasoenteric tube-related incidents in hospitalised patients: a study protocol of a multicentre prospective cohort study
Source: PubMed Central journal article supplement — BMJ Open. 2019 Jul 24;9(7):e027967. doi: 10.1136/bmjopen-2018-027967 (PMC6661907; doi:10.1136/bmjopen-2018-027967), 2019-07-24
Supplement: bmjopen-2018-027967.draft_revisions.pdf [file bmjopen-2018-027967.draft_revisions.pdf]

# BMJ Open

BMJ Open is committed to open peer review. As part of this commitment we make the peer review history of every article we publish publicly available.

When an article is published we post the peer reviewers' comments and the authors' responses online. We also post the versions of the paper that were used during peer review. These are the versions that the peer review comments apply to.

The versions of the paper that follow are the versions that were submitted during the peer review process. They are not the versions of record or the final published versions. They should not be cited or distributed as the published version of this manuscript.

BMJ Open is an open access journal and the full, final, typeset and author-corrected version of record of the manuscript is available on our site with no access controls, subscription charges or pay-per-view fees (<http://bmjopen.bmj.com>).

If you have any questions on BMJ Open's open peer review process please email [info.bmjopen@bmj.com](mailto:info.bmjopen@bmj.com)

# BMJ Open

## Feeding tube-related incidents in hospitalized patients: a study protocol of a prospective study

|                               |                                                                                                                                                                                                                                                                                                                                                                                                                                                                                                                                                                                                                                               |
|-------------------------------|-----------------------------------------------------------------------------------------------------------------------------------------------------------------------------------------------------------------------------------------------------------------------------------------------------------------------------------------------------------------------------------------------------------------------------------------------------------------------------------------------------------------------------------------------------------------------------------------------------------------------------------------------|
| Journal:                      | <i>BMJ Open</i>                                                                                                                                                                                                                                                                                                                                                                                                                                                                                                                                                                                                                               |
| Manuscript ID                 | bmjopen-2018-027967                                                                                                                                                                                                                                                                                                                                                                                                                                                                                                                                                                                                                           |
| Article Type:                 | Protocol                                                                                                                                                                                                                                                                                                                                                                                                                                                                                                                                                                                                                                      |
| Date Submitted by the Author: | 18-Nov-2018                                                                                                                                                                                                                                                                                                                                                                                                                                                                                                                                                                                                                                   |
| Complete List of Authors:     | Gimenes, Fernanda; University of São Paulo at Ribeirão Preto College of Nursing, General and Specialized Nursing<br>Pereira, Marta; University of São Paulo at Ribeirão Preto College of Nursing, General and Specialized Nursing<br>Prado, Patricia; Universidade Federal do Acre<br>Carvalho, Rhanna; Ceara State Univeristy<br>Koepp, Janine; Universidade de Santa Cruz do Sul<br>Freitas, Ligia; Faculty of Science and Technology of Campos Gerais<br>Teixeira, Thalyta; Universidade Paulista (UNIP), Nursing<br>Miasso, Adriana; University of São Paulo at Ribeirão Preto College of Nursing, Psychiatric Nursing and Human Sciences |
| Keywords:                     | adverse effects, enteral nutrition, intubation, gastrointestinal, nasogastric intubation                                                                                                                                                                                                                                                                                                                                                                                                                                                                                                                                                      |
|                               |                                                                                                                                                                                                                                                                                                                                                                                                                                                                                                                                                                                                                                               |

SCHOLARONE™  
Manuscripts

1  
2  
3 **Feeding tube-related incidents in hospitalized patients: a study protocol of a**  
4 **prospective study**  
5

6 F R E Gimenes, <sup>1</sup> M C A Pereira, <sup>1</sup> P R Prado, <sup>2</sup> R E F L Carvalho, <sup>3</sup> J Koepp, <sup>4</sup> L M Freitas,  
7 <sup>5</sup> T C A Teixeira, <sup>6</sup> A I Miasso<sup>1</sup>  
8  
9

10  
11 **Author affiliations**  
12

13 <sup>1</sup> University of São Paulo at Ribeirão Preto College of Nursing, WHO Collaborating Centre for  
14 Nursing Research Development, São Paulo, Brazil.  
15

16 <sup>2</sup> Federal University of Acre, Acre, Brazil.

17 <sup>3</sup> Ceara State Univeristy, Ceara, Brazil.  
18

19 <sup>4</sup> University of Santa Cruz do Sul, Rion Grande do Sul, Brazil.

20 <sup>5</sup> Faculty of Science and Technology of Campos Gerais (FACICA), Minas Gerais, Brazil.  
21

22 <sup>6</sup> Universidade Paulista (UNIP), Campinas, Brazil  
23  
24

25  
26 **Corresponding Author**  
27

28 Fernanda R.E. Gimenes

29 Avenida Bandeirantes 3900, Monte Alegre, Ribeirão Preto, São Paulo, Brazil

30 Phone number: 55-16-3315-3420. Fax number: 55-16-3315-0518.  
31

32 fregimenes@eerp.usp.br  
33  
34

35 **Keywords:** adverse effects; enteral nutrition; intubation, gastrointestinal; nasogastric  
36 intubation  
37

38 **Word count:** 3,951  
39  
40  
41  
42  
43  
44  
45  
46  
47  
48  
49  
50  
51  
52  
53  
54  
55  
56  
57  
58  
59  
60

## ABSTRACT

**Introduction:** Hospitalized patients having feeding tubes are at constant risk for incidents; therefore, healthcare professionals need to routinely monitor risks and adopt strategies for patient safety and quality of care.

**Aim:** To evaluate the feeding tube-related incidents in hospitalized patients and associated factors.

**Methods:** This is a multicenter study, with quantitative, analytical, prospective design. Data will be collected at the general medical ward of seven Brazilian hospitals in the North, Northeast, Southeast, and South. The sample will consist of 391 patients that require feeding tube for enteral nutrition and/or medication during hospitalization. Three different methods will be used to identify the incidents: (1) healthcare professionals and patients/caregivers will be required to report any feeding tube-related incidents; (2) researchers will visit the wards to get information about the incidents with healthcare professionals and patients/caregivers; (3) the researchers will review the medical records looking for information on the occurrence of any feeding tube-related incidents. Demographic, clinical and therapeutic characteristics will be obtained from the medical records and will be registered in an electronic data collection tool developed for the purposes of this study. The complexity of patients will be assessed by the Patient Classification System, and the severity of comorbid diseases, through the Charlson Comorbidity Index.

**Implication for practice:** It is expected that the results encourage the use of evidence effectively to influence the scientific foundation for clinical practice and the development of evidence-based policies that will prevent, manage and eliminate complications caused by feeding tube-related incidents, and improve the quality and safety of care provided to hospitalized patients.

### Strengths and limitations of this study

- Several single-centre studies have identified the prevalence of feeding-tube related incidents in general inpatients, however, there are no studies reporting on those incidents across multiple hospital sites and at national level.
- A multicentred study may ascertain better generalisability of the data.
- To our knowledge, this is the first large scale study in Brazil and in Latin America documenting the incidence of feeding-tube related incidents in internal medicine wards.
- Although voluntary reporting can detect a broad range of incidents, this system misses the vast majority of incidents and cannot provide stable estimates of the true underlying causes.

1  
2  
3  
4  
5  
6  
7  
8  
9  
10  
11  
12  
13  
14  
15  
16  
17  
18  
19  
20  
21  
22  
23  
24  
25  
26  
27  
28  
29  
30  
31  
32  
33  
34  
35  
36  
37  
38  
39  
40  
41  
42  
43  
44  
45  
46  
47  
48  
49  
50  
51  
52  
53  
54  
55  
56  
57  
58  
59  
60

- It is difficult to demonstrate causality between feeding tube-related incidents and negative patient outcomes due to a number of confounding factors.

For peer review only

## INTRODUCTION

During hospitalization, patients with advanced disease have caloric and protein malnutrition, and therefore require nutritional and drug interventions. Therefore, these patients often need enteral feeding to ensure that their daily nutritional and medical needs are met.<sup>1</sup> Data from the American Society for Enteral and Parenteral Nutrition (ASPEN) revealed that more than 245,000 patients per year require at least a temporary feeding tube during a hospital stay, along with another nearly 31,000 patients that are on enteral nutrition at home.<sup>2</sup> In the United States, about one million feeding tubes are introduced in adults and children each year<sup>3</sup> and the rate of complications is 2% to 36%.<sup>4-6</sup>

Although inserting an enteral feeding tube is a relatively innocuous procedure, improper positioning can cause severe and fatal complications.<sup>7-9</sup> One of the major incidents related to the enteral tube is the wrong connection. The design of these devices is such that it is possible to infuse enteral feeding and / or medications via an unwanted route, such as intravenous route.<sup>10,11</sup>

It is also common having inadvertent positioning of the tube in the respiratory tract, resulting in bronchoaspiration and pneumothorax.<sup>8,12-14</sup> Pulmonary aspiration occurs in 2% to 10% of patients receiving enteral feeding. The inadvertent insertion of the tube into the tracheal tree results in discomfort for the patient, delayed feeding, increased morbidity and mortality, and length of stay, resulting in onus for the institution and patients.<sup>5,15</sup> Therefore, health care professionals need to routinely monitor risks and adopt strategies aimed at patient safety.

Other incidents may occur during the insertion and / or progression of the feeding tube through the gastrointestinal tract, such as sinusitis, vomiting, nasopharyngeal discomfort, erosion of the nasal septum, epistaxis, and blood return by the tube during guidewire withdrawal.<sup>16</sup> In Brazil, this data is not available, however, it is observed that feeding tube is a common procedure in most Brazilian health institutions.<sup>17</sup>

Regarding medication administration, administering drugs with absorption at the intestinal level in patients using nasogastric tube is a challenge. As demonstrated in the literature, some drugs should never be crushed and administered through a nasogastric tube because they have enteric or controlled release protection coatings.<sup>18</sup> The grinding process of these drugs can destroy the coating film and result in incidents, exposing patients to unnecessary risks.<sup>19</sup> In this regard, experts argue that healthcare professionals should not assume that a drug formulated to be administered orally can be administered safely through a feeding tube because drug delivery mechanisms can be altered or destroyed, reducing effectiveness or increasing risk of toxicity.<sup>20</sup>

In order to achieve adequate clinical outcomes in hospitalized patients, it is essential that medication and enteral nutrition therapy be administered appropriately. However, nursing

1  
2  
3 guidelines on enteral feeding tube care are not based on scientific evidence, but in traditions,  
4 rituals and expert opinions, exposing patients to unnecessary harm.<sup>21</sup>  
5

6 Although feeding tube-related incidents are common in hospitals settings with  
7 significant morbidity and mortality, the issue has not been extensively studied, especially in  
8 developing countries. Given that the number of patients with chronic conditions have  
9 increased significantly worldwide, as well as in Brazil, it is critical that health care professionals  
10 employ a repertoire of evidence based interventions in order to provide safe and high quality  
11 care.<sup>22,23</sup> However, there is a knowledge gap regarding the safe handling of enteral feeding  
12 tubes in Brazilian healthcare institutions. Studies that aim to identify the most frequent feeding  
13 tube-related incidents that occurred during hospital stay, can reduce that gap and consequently  
14 reduce the risks of complications and lower overall cost of care.  
15  
16  
17  
18  
19

20 The results of the study will contribute to the production of knowledge and its  
21 application in clinical practice for injury reduction towards a safer environment for patient care;  
22 will provide national and international data that reflect the problem of feeding tube-related  
23 incidents in acute care units; and will contribute to the use of the evidence in an efficient way  
24 to influence the development of national practices and policies aimed at managing the risks  
25 associated with the feeding tube.  
26  
27  
28  
29  
30

### 31 **Significance and theoretical framework**

32 Enteral nutrition is administered through a nasogastric tube, a nasoenteric tube, or an ostomy.  
33 These devices are not exclusively used for administration of enteral nutrition. They are also  
34 frequently used for administering drugs. The consequence of this duo use is the increased  
35 risk of tube obstruction, physical-chemical incompatibilities, and potential drug-nutrient  
36 interactions.<sup>24</sup> In a previous study it was shown that 74% of nurses had employed wrong  
37 medication administration methods to deliver medicines through feeding tube and according  
38 to researchers, those errors could reduce the effects of drugs and lead to unsuccessful  
39 treatment.<sup>25</sup>  
40  
41  
42  
43  
44  
45

46 According to a study conducted in a Brazilian private hospital, the main reason for the  
47 loss of the feeding tubes was obstruction (36%) related to wrong medication preparation and  
48 administration techniques.<sup>26</sup> Estimates of incidence of clogged feeding tubes range widely  
49 from 12.5%-45%, but it is undisputed that they result in increased costs for patients and  
50 institutions.<sup>27</sup> Thus, health care practitioners, especially nurses, should not assume that a  
51 medication intended to be taken by mouth can be safely administered through a feeding tube,  
52 because this misconception can result in harm to patients and increase medical costs to  
53 society.<sup>20</sup>  
54  
55  
56  
57

58 Another incident related to improper medication administration via feeding tube is  
59 caused by drug interactions in elderly people due to polypharmacy, with a prevalence of 20-  
60

1  
2  
3 40%. Polypharmacy increases the complexity of clinical management and contributes to  
4 medication adverse events.<sup>28</sup>  
5

6 Therefore, the causes of the incidents are multifaceted and that the consequences are  
7 associated with increasing complexity of patients and treatments, intensifying the need for  
8 measures aimed at improving the quality of care. In this sense, opportunities to share  
9 knowledge are fundamental to patient safety.<sup>29</sup>  
10  
11

12 Efforts to overcome these problems have resulted in the development of international  
13 programs and policies. For instance, the WHO proposed the patient safety research cycle and  
14 the first step in improving care quality and safety is to measure the occurrence of incidents in  
15 order to know the magnitude of the problem. The WHO then suggests understanding the  
16 causes and identifying solutions.<sup>30</sup>  
17  
18  
19

20 In Brazil, the Ministry of Health and the National Health Surveillance Agency (ANVISA),  
21 in line with WHO's global initiatives, launched the National Patient Safety Program in mid-April  
22 2013 with the aim of promoting strategies aimed at prevention and reduction of risks  
23 associated with health care. Among the strategies, increasing patient safety research.<sup>31,32</sup>  
24  
25  
26

27 Considering that patient safety is a global problem affecting countries at all levels of  
28 development;<sup>33</sup> that the production of knowledge and its application in clinical practice can  
29 promote a safe environment for the provision of care; that in Brazil, there is concern about the  
30 need to increase knowledge on this issue; that there are insufficient national data that reflect  
31 the problem of the incidents related to enteral feeding tube in hospitalized patients; thus the  
32 present study is necessary. We expect that the results of this study will provide high quality  
33 evidence that will support interventions designed to improve patient safety in use of feeding  
34 tubes.  
35  
36  
37  
38

39 The objective of this study is to evaluate the feeding tube-related incidents in  
40 hospitalized patients and the associated factors. The secondary objectives are:  
41

- 42 1. To analyse the association between the feeding tube-related incidents and the  
43 complexity of the patients;
- 44 2. To analyse the association between the feeding tube-related incidents and the severity  
45 of comorbid diseases;
- 46 3. To examine the predictive role of Charlson Comorbidity Index (CCI) on mortality of  
47 patients having feeding tube;
- 48 4. To assess potential drug interactions (pDDI) and its association with patient complexity  
49 and comorbid diseases.  
50  
51  
52  
53  
54  
55  
56

## 57 **METHODS**

### 58 **Research Design**

59 This is a multicenter study, with quantitative design, prospective and analytical.  
60



## Setting

Seven centers across Brazil will participate in this study; the centers include a mix of community and university hospitals, hospitals with and without residency programs, and public and private hospitals; they also vary in size. The hospitals will be as follows: Acre Hospital of Clinics - HCA, General Hospital of Fortaleza - HGF, Hospital of Clinics of the Medical School of Ribeirão Preto of the University of São Paulo - HCFMRP-USP, Américo Brasiliense State Hospital - HEAB, Sumaré State Hospital - HES, São Vicente de Paulo Hospital - HSVP, and Santa Cruz Hospital - HSCRGS.

The medical ward of these hospitals was chosen for this study because it provides care for adult patients in various medical specialties and most of the patients have chronic conditions, thus many require enteral nutrition and medications through a feeding tube.

## Subjects

The study population will be the patients admitted to the medical ward of the seven Brazilian hospitals that require a feeding tube during hospitalization. The inclusion criteria are: patients older than 18 years; who are admitted to the medical ward with a nasogastric or a nasoenteric feeding tube (or patients who require the insertion of a nasogastric or nasoenteric feeding tube during hospitalization); and patients that have been hospitalized for at least 24 hours. The exclusion criteria is: patients having feeding tube who are readmitted to the medical wards / units during data collection period.

Sampling size was determined by a stratified random sampling with proportional allocation by strata, where each stratum is formed by the floors / units of each hospital (Table 1):

**Table 1.** Determination of sample size, 2018

| Hospital / Strata | Number of inpatients | Prevalence of patients with feeding tube | Estimated size of each stratum |
|-------------------|----------------------|------------------------------------------|--------------------------------|
| HCA               | 980                  | 0.1908                                   | 58                             |
| HGF               | 192                  | 0.1563                                   | 11                             |
| HCFMRP-USP        | 2247                 | 0.0788                                   | 134                            |
| HEAB              | 783                  | 0.1073                                   | 47                             |
| HES               | 1991                 | 0.1828                                   | 119                            |
| HSVP              | 323                  | 0.0650                                   | 19                             |
| HSCRGS            | 48                   | 0.0324                                   | 3                              |

The formula for the calculation of the sample size is given by:

$$n = \frac{z_{\alpha/2}^2 N(1-P)}{\varepsilon^2 P(N-1) + z_{\alpha/2}^2 (1-P)} \quad (1)$$

,where P represents the prevalence of the event of interest

(column 4 of table 1),  $z_{\alpha/2}$  represents the level of significance adopted and  $\varepsilon$  is the relative sampling error. If the sample size calculated by the expression given in (1) is greater than 20% of the population the following finite correction procedure is adopted:

$$nc = \frac{n}{(1 + n/N)} \quad (2),$$

where N is the total size of the study population and n is the value obtained

in (1). The sample was allocated proportionally among the H strata according to the formula:

$$n_h = n \frac{N_h}{N}$$

, where N is the total population of hospitalized patients (N = 6,564), and  $N_h$  is the total of each stratum H. Population totals are found in the second column of table 1. Adopting the parameters of relative error of 20%, level of significance of 5% and the total population of 6,564, a total sample size of 391 patients was calculated. The required sample sizes of each strata are found in the last column of Table 1.

## Instruments

Data collection tools will be composed of three virtual forms which will be developed by the research team, and assessed for face and content validity by a panel of experts. The forms will be developed in Portuguese language and using an online platform (Survey Monkey®).

The experts will be selected through the analysis of existing curricula in the database of the Brazilian National Council for Scientific and Technological Development (CNPq) and will be invited to participate in the study, by invitation letter sent by electronic mail. Then the access links to the electronic forms will be made available for the experts to carry out their analysis; the experts will have up to 30 days to evaluate the electronic forms and give their feedback to the researchers. The modified forms will be tested through a pre-test, where the forms will be applied to five hospitalized patients from the first day of use of a feeding tube until patient discharge.

At admission, demographic, clinical, and therapeutical information will be recorded in the first electronic data collection form, including:

- ✓ *Demographic data*: registration number; date of admission to the ward / unit; date of birth; city / state of origin; gender; skin color; marital status; education level; profession; origin of the referral.
- ✓ *Clinical data*: principal and secondary International Classification of Diseases (ICD); comorbidities; the final score of the Patient Classification System (PCS).<sup>34</sup>

- 1  
2  
3 ✓ *Therapeutic data:* data related to the feeding tube (type; gauge; location; tests  
4 performed to confirm the correct positioning and results of the tests); data related to  
5 the enteral nutrition (type, total volume in 24 hours, frequency of administration); data  
6 related to the medications prescribed (drug name; dosage form; dose; route of  
7 administration; frequency of administration; and planned / scheduled administration  
8 time).

9  
10  
11  
12 The second electronic data collection form will include variables related to the  
13 incidents:

- 14  
15  
16 ✓ *Incident:* date and time of occurrence; type of incident (mechanic; metabolic;  
17 gastrointestinal; infectious; and others);<sup>4</sup> consequence of the incident for the patient,  
18 according to the WHO (none; mild; moderate; severe; and fatal);<sup>35</sup> measures adopted  
19 after the incident; sources of information on the occurrence of the incident; and means  
20 of obtaining information about the incident.  
21  
22 ✓ *Clinical:* principal and secondary ICD; comorbidities; the final score of the PCS.<sup>34</sup>  
23  
24 ✓ *Therapeutic:* data related to the enteral nutrition (type, total volume in 24 hours,  
25 frequency of administration); data related to the medications prescribed (drug name;  
26 dosage form; dose; route of administration; frequency of administration; and planned  
27 / scheduled administration time).

28  
29  
30  
31 The third electronic data collection form will include variables related to the start of  
32 feeding tube and patient follow-up:

- 33  
34 ✓ *Clinical:* date of the start of the feeding tube use; principal and secondary ICD;  
35 comorbidities; the final score of the PCS.<sup>34</sup>  
36  
37 ✓ *Therapeutic:* data related to the medications prescribed 24 hours after feeding tube  
38 insertion (or 24 hours after admission if the patient is admitted at the unit with a feeding  
39 tube); medications prescribed 120 hours after feeding tube insertion (or 120 hours  
40 after admission if the patient is admitted at the unit with a feeding tube); and  
41 medications prescribed 24 hours before patient discharge.  
42  
43 ✓ Date of programmed feeding tube removal and the main reason; date and time of  
44 patient discharge; reason for patient discharge.  
45  
46  
47  
48  
49

## 50 Procedures

51  
52 At each center, a registered nurse in the medical ward and a research assistant will serve as  
53 a liaison to the study investigators; a designated nurse coordinator will ensure that the  
54 collection of data will be carried out completely and correctly. The liaison nurse and the  
55 research assistant at each center will attend a total of 16 hours of theoretical and practical  
56 formal training sessions led by the regional study coordinator, at which the overall study design  
57 will be presented and each electronic data collection forms will be explained. The study  
58  
59  
60

1  
2  
3 protocol will neither mandate nor direct any element of patient care, and thus will pose no risk  
4 to patients.  
5

6 In addition, a data collection guideline will be developed with the purpose of  
7 standardizing data recording in the eight hospitals participating in the study. This guideline will  
8 consist of general information related to the research project; general instructions on how to  
9 access the electronic data collection forms using mobile devices; definition of each variable  
10 and additional information for completing the variables that make up the three electronic data  
11 collection forms. The guideline will be available on printed version and by e-mail to assist all  
12 the research team on data collection.  
13  
14  
15  
16

17 Before data collection starts, the researchers will identify the patients who will start the  
18 use of a feeding tube (nasogastric or nasoenteric) during hospitalization, according to the  
19 inclusion criterias proposed for this study. Researchers will explain the research objectives  
20 and will ask patients, or their legal guardian's, to voluntarily sign the Informed Consent Form.  
21  
22  
23

24 For purposes of confidentiality, each patient will be identified by a unique identifying  
25 number; data will be collected from the moment a patient starts using a feeding tube until the  
26 patient is discharged (due to death or non-death).  
27

28 Using a mobile device, research assistants will collect demographic data at patient  
29 admission, and prospectively record clinical and therapeutic data from the patients' medical  
30 record. Considering that four hospitals participating in this study have present electronic  
31 medical records, these will be accessed in the computers available in the medical wards /  
32 units. In both situations, the researchers will request permission from the nurse responsible  
33 for the unit to access the computers, and to record the information in the electronic data  
34 collection forms. The consultation of the medical records will occur in the afternoon or at night,  
35 because these are the periods with the least movement of people.  
36  
37  
38  
39  
40  
41

#### 42 *Assessment of the complexity of patients having feeding tubes*

43 Patient complexity will be assessed by an experienced nurse, member of the research team,  
44 on the first day of feeding tube use, on the day of the incident, and weekly until patient  
45 discharge. Nurses will have up to 24 hours to complete their evaluation.  
46  
47  
48

49 For this purpose, the PCS proposed by Fugulin <sup>34</sup> will be used. The PCS is  
50 recommended by the Federal Nursing Council, Brazil, <sup>36</sup> and it was developed to classify  
51 patients according to the degree of dependence of the nursing team. This instrument has nine  
52 critical indicators: mental state, oxygenation, vital signs, motility, ambulation, feeding, body  
53 care, elimination and therapeutics. Therefore, the scores are distributed in five categories that  
54 correspond to the complexity of the assistance: minimum (scores of 9-14), intermediate  
55 (scores of 15-20), high-dependency (scores of 21-26), semi-intensive (scores of 27-31), and  
56 intensive care (scores > 31).  
57  
58  
59  
60

### *Assessment of the severity of comorbid diseases of patients having feeding tubes*

Regarding the severity of comorbid diseases, this will be evaluated on admission at the medical ward / unit; on the first day of use of the feeding tube; on the day of the incident; and weekly until patient discharge. For this purpose, the Charlson Comorbidity Index (CCI)<sup>37</sup> will be used. The CCI is the most widely used comorbidity, which is a method of categorizing patients' comorbidities, according to the ICD. The aim of the CCI is to measure the severity of the patient, regardless of the main diagnosis, and therefore, to predict the one-year mortality of patients. The final score is the result of the sum of the weights assigned to the comorbidities recorded as secondary diagnoses; the higher the score, the greater the risk of the patient dying. It should be noted that the CCI will be adjusted according to the patient's age, so that, from the age of 50, a point will be added to the final score for every decade of life.<sup>37</sup>

Based on the final CCI score, patients will be divided into three groups: mild (with CCI scores of 1–2); moderate (with CCI scores of 3–4); and severe (with CCI scores  $\geq 5$ ). In addition, survival time in days will be calculated from the first day patient start using a feeding tube during hospital stay to the death of a patient.<sup>38</sup>

### *Assessment of the feeding tube-related incidents*

In this study, incident was defined as an event or circumstance that could have resulted, or did result, in unnecessary harm to a patient.<sup>35</sup> The feeding tube-related incidents considered in this study are:

- ✓ Mechanical incident (unplanned / accidental removal; obstruction; displacement / migration; epistaxis; nasal mucosa edema; perforation or stenosis of the esophagus; perforation of the brain; pneumothorax; various attempts to introduce the tube).
- ✓ Metabolic incident (hypernatremia; hyponatremia; hyperglycemia; hypoglycemia).
- ✓ Gastrointestinal incident (nausea / vomiting; diarrhea; constipation; colic / abdominal distension / flatulence).
- ✓ Infectious incident (aspiration pneumonia; gastroenterocolitis).
- ✓ Other incidents (skin lesion associated with the feeding tube insertion; bronchoaspiration; wrong connection; quality of the tube material).

Based on previous studies,<sup>39,40</sup> three methods will be used for incidents detection:

- (1) Prompted spontaneous reporting: healthcare professionals (nursing and medical staff) and patients / caregivers will be continuously prompted to report any feeding tube-related incident to the investigators. A pen and a booklet containing instructions on incident reporting will be available and remained at the bedside of each patient participating in the study;

1  
2  
3 (2) Researchers will visit the wards / units at least twice a week to request information  
4 about the incidents, along with healthcare professionals (nursing and medical staff)  
5 and patients / caregivers;  
6  
7

8 (3) Researchers will review the booklet and medical records at least twice a week to obtain  
9 information about feeding tube-related incident.  
10

11 Using a mobile device, the research assistant will record data related to the incidents  
12 in the electronic data collection form developed for this purpose. More than one incident may  
13 occur on the same day and/or at the same time (eg. feeding tube obstruction and unplanned  
14 removal), thus each incident will be recorded on a different form, resulting in a form filled for  
15 each feeding tube related incident.  
16  
17  
18

### 19 *Assessment of potential drug interactions in patients having feeding tubes*

20 Regarding the analysis of potential drug interactions, it will be performed only in patients with  
21 a residence time of at least five days, because longer hospital stays are associated with the  
22 likelihood of adverse drug events.<sup>41</sup>  
23  
24

25 The research assistants will record on electronic data collection forms all medications  
26 and enteral nutrition prescribed for patients, regardless of whether they were administered or  
27 not. Data related to the medications will be collected in the following moments of  
28 hospitalization: at admission; 24 hours and 120 hours after admission because it is the period  
29 of greatest therapeutic adjustment.<sup>42-44</sup> Data related with medications will be also recorded  
30 24 hours before patient discharge and on the day of the incident. Data related with enteral  
31 nutrition will be recorded on admission and on the day of the incident.  
32  
33  
34  
35  
36  
37

38 Medications will be classified according to the WHO Chemical Anatomical Therapeutic  
39 Classification (ATC),<sup>45</sup> and the analysis of drug interactions will be performed based on drug  
40 monographs from the DrugReax System database from Thomson Healthcare® because it is  
41 a highly reliable software.<sup>46</sup> The software is also available in the journal portal of the  
42 Coordination of Improvement of Higher Level Personnel - CAPES, Brazil. Potential drug  
43 interactions will be classified according to the speed of action, documentation and severity, as  
44 recommended by DrugReax®.  
45  
46  
47  
48  
49

### 50 **Data analysis**

51 Data will be downloaded from the Survey Monkey® to a computer file and analysed using the  
52 Statistical Package for the Social Program Sciences® (SPSS) version 22.0. In the statistical  
53 analysis, we will apply: calculation of proportions and measures of central tendency and  
54 variability. Quantitative variables will be assessed for normal distribution using the  
55 Kolmogorov-Smirnov test. The importance of the normal distribution evaluation is justified,  
56 among others, by the subsequent indication of parametric and non-parametric statistical tests.  
57  
58  
59  
60

1  
2  
3 Pearson's Chi-square ( $\chi^2$ ) and Fisher's exact tests will be used to compare the response  
4 variables with the categorical explanatory variables, when indicated. For the comparison of  
5 the variable responses with the quantitative explanatory variables, t or Mann-Whitney tests  
6 will be performed, when indicated.  
7  
8

9 To examine the predictive role of Charlson Comorbidity Index (CCI) on mortality of  
10 patients having feeding tube, a one-way analysis of variance (ANOVA) will be used to compare  
11 group differences stratified by CCI, and otherwise Chi-square tests will be applied. All analyzes  
12 will be carried out considering a significance level of 5% ( $\alpha = 0,05$ ).  
13  
14  
15  
16

### 17 **Patient and Public Involvement**

18 Patients will be informed of possible risks which are: discomfort or embarrassment to answer  
19 questions about feeding tube-related incidents, thus patients will be able to refuse to answer  
20 any question that he/she feels inconvenient or inappropriate, without causing harm to their  
21 care. In addition, participants will be informed that the results will be used for possible  
22 publications. We will guarantee their confidentiality and anonymity.  
23  
24  
25  
26  
27

### 28 **Contributors**

29 FREG and MCAP initiated the project and are the chief investigators on the project. PRP,  
30 REFLC, JK, LMF, TCAT, and AIMi, are associate investigators and all made significant  
31 contributions to the protocol in their specific areas of expertise. FREG prepared the first draft  
32 of this manuscript and all authors have reviewed and provided input.  
33  
34  
35  
36  
37

### 38 **Funding**

39 This research received no specific grant from any funding agency in the public, commercial or  
40 not-for-profit sectors.  
41  
42  
43

### 44 **Competing interests**

45 None declared.  
46  
47  
48

### 49 **Ethics approval**

50 The study was approved by the Research Ethics Committee of the University of São Paulo at  
51 Ribeirão Preto College of Nursing (CAAE: 56166016.1001.5393) and written informed consent  
52 will be obtained from each patient, or their guardian, prior to enrollment in the study.  
53  
54  
55  
56

### 57 **References**

58 1. Gimenes FRE, Anacleto TA. [*Medication preparation and administration through*  
59 *feeding tubes and ostomy*] [press release]. Belo Horizonte: Boletim ISMP Brasil, 2015.  
60

2. Grant M, Martin S. *Delivery of enteral nutrition*. Advanced Practice in Acute & Critical Care: AACN Clinical Issues, 2000.
3. Krenitsky J. Blind bedside placement of feeding tubes: treatment or threat? . *Practical Gastroenterology* 2011;32-42.
4. Blumenstein I, Shastri YM, Stein J. Gastroenteric tube feeding: techniques, problems and solutions. *World J Gastroenterol* 2014;20(26):8505-24.
5. Figueredo LP. [*Complications of enteral nutritional therapy (NER) and associated factors in hospitalized patients*]. São Paulo: Universidade de São Paulo, 2011.
6. Stayner JL, Bhatnagar A, McGinn AN, Fang JC. Feeding tube placement: errors and complications. *Nutr Clin Pract* 2012;27(6):738-48.
7. American Association of Critical-Care Nurses. *AACH practice alert: verification of feeding tube placement* [press release]. Aliso Viejo (CA): AACN, 2009.
8. Amirlak B, Amirlak I, Awad Z, Zahmatkesh M, Pipinos I, Forse A. Pneumothorax following feeding tube placement: precaution and treatment. *Acta Med Iran* 2012;50(5):355-8.
9. Arnau Alfonso JJ. [Methods for determining the correct location of a nasogastric tube after its insertion in adults patients]. *Enferm Clin* 2013;23(2):81-3.
10. Sorokin R, Gottlieb JE. Enhancing patient safety during feeding-tube insertion: a review of more than 2,000 insertions. *J Parenter Enteral Nutr* 2006;30(5):440-5.
11. Millin CJ, Brooks M. Reduce--and report--enteral feeding tube misconnections. *Nursing* 2010;40(11):59-60.
12. Metheny NA, Meert KL, Clouse RE. Complications related to feeding tube placement. *Curr Opin Gastroenterol* 2007;23(2):178-82.
13. Waitzberg D, Enck C, Miyahira N, Mourão J, Faim M, Oliseski M, et al. [*Nutrition Therapy: quality indicators*]. São Paulo: Project Guidelines; Brazilian Medical Association; Federal Council of Medicine, 2011.
14. Pillai JB, Vegas A, Brister S. Thoracic complications of nasogastric tube: review of safe practice. *Interac Cardiovasc Thorac Surg* 2005;4(5):429-33.
15. Gilbert RT, Burns SM. Increasing the safety of blind gastric tube placement in pediatric patients: the design and testing of a procedure using a carbon dioxide detection device. *J Pediatr Nurs* 2012;27(5):528-32.
16. Kuo YW, Yen M, Fetzer S, Lee JD. Reducing the pain of nasogastric tube intubation with nebulized and atomized lidocaine: a systematic review and meta-analysis. *J Pain Symptom Manage* 2010;40(4):613-20.
17. Ferreira AM. [Nasogastric and nasoenteric feeding tubes: how may the discomfort during placement be reduced?]. *Rev Esc Enferm USP* 2005;39:358-9.
18. Mitchell JF. *Oral dosage forms that should not be crushed*. Institute for Safe Medication Practices – ISMP, 2014.



19. van den Bemt P, Cusell MBI, Overbeeke PW, Trommelen M, van Dooren D, Ophorst WR, et al. Quality improvement of oral medication administration in patients with enteral feeding tubes. *Qual Saf Health Care* 2006;15(1):44-7.
20. Grissinger M. Preventing errors when drugs are given via enteral feeding tubes. *P t* 2013;38(10):575-6.
21. Simons SR, Abdallah LM. Bedside Assessment of enteral tube placement: aligning practice with evidence. *Am J Nurs* 2012;112(2):40-6.
22. Brazil. [Strategic actions plan for coping with chronic noncommunicable diseases (CNCD) in Brazil 2011-2022]. Brasília: Ministry of Health, Secretariat of Health Surveillance, Department of Health Situation Analysis, 2011.
23. World Health Organization. *Global status report on noncommunicable diseases 2014*. Geneva: World Health Organization, 2014.
24. Heydrich J, Heineck I, Bueno D. Observation of preparation and administration of drugs by nursing assistants in patients with enteral feeding tube. *Braz J Pharm Sci* 2009;45:117-20.
25. Emami S, Hamishehkar H, Mahmoodpoor A, et al. Errors of oral medication administration in a patient with enteral feeding tube. *J Res Pharm Pract* 2012;1(1):37-40.
26. Pereira SRM, Coelho MJ, Mesquita AMFd, et al. Causes for the unplanned removal of the feeding tube in intensive care. *Acta Paul Enf* 2013;26:338-44.
27. Fisher C, Blalock B. *Clogged feeding tubes: a clinician's thorn*. In: Parrish CR, editor. *Practical Gastroenterology* 2014.
28. Palleria C, Di Paolo A, Giofrè C, et al. Pharmacokinetic drug-drug interaction and their implication in clinical management. *J Res Med Sci* 2013;18(7):601-10.
29. Hoffmann B, Beyer M, Rohe J, et al. "Every error counts": a web-based incident reporting and learning system for general practice. *Qual Saf Health Care* 2008;17(4):307-12.
30. World Health Organization. *Patient safety research: a guide for developing training programmes*. Geneva: WHO, 2012.
31. Brazil. [Ordinance No. 529, of April 1, 2013. Establishes the National Patient Safety Program (PNSP)]. Brasília, DF: Diário Oficial da União, 2013.
32. Brazil. [Reference Document for the National Patient Safety Program]. In: Ministry of Health, Oswaldo Cruz Foundation, National Health Surveillance Agency, editors. Brasília: Ministry of Health, 2014.
33. World Health Organization, WHO Patient Safety. *WHO patient safety research : better knowledge for safer care*. Geneva: World Health Organization, 2009.
34. Fugulin F. [Sizing of nursing staff: evaluation of the staffing of hospitalization units of a teaching hospital]. São Paulo: School of Nursing, University of São Paulo, 2002.

- 1
  - 2
  - 3
  - 4
  - 5
  - 6
  - 7
  - 8
  - 9
  - 10
  - 11
  - 12
  - 13
  - 14
  - 15
  - 16
  - 17
  - 18
  - 19
  - 20
  - 21
  - 22
  - 23
  - 24
  - 25
  - 26
  - 27
  - 28
  - 29
  - 30
  - 31
  - 32
  - 33
  - 34
  - 35
  - 36
  - 37
  - 38
  - 39
  - 40
  - 41
  - 42
  - 43
  - 44
  - 45
  - 46
  - 47
  - 48
  - 49
  - 50
  - 51
  - 52
  - 53
  - 54
  - 55
  - 56
  - 57
  - 58
  - 59
  - 60
35. World Health Organization. *Conceptual framework for the international classification for patient safety*. Geneva: World Health Organization, 2009.
36. Federal Nursing Council. [Resolution COFEN N°293/2004]. Rio de Janeiro: COFEN, 2004.
37. Charlson ME, Pompei P, Ales KL, MacKenzie CR. A new method of classifying prognostic comorbidity in longitudinal studies: development and validation. *J Chronic Dis* 1987;40(5):373-83.
38. Huang YQ, Gou R, Diao YS, Yin QH, Fan WX, Liang YP, et al. Charlson comorbidity index helps predict the risk of mortality for patients with type 2 diabetic nephropathy. *J Zhejiang Univ Sci B* 2014;15(1):58-66.
39. Bates DW, Spell N, Cullen DJ, Burdick E, Laird N, Petersen LA, et al. The costs of adverse drug events in hospitalized patients. *JAMA* 1997;277(4):307-11.
40. Bates DW, Cullen DJ, Laird N, Petersen LA, Small SD, Servi D, et al. Incidence of adverse drug events and potential adverse drug events. Implications for prevention. *JAMA* 1995;274(1):29-34.
41. Strom BL, Kimmel SE, Hennessy S. *Pharmacoepidemiology*: Wiley, 2011.
42. Biswal S, Mishra P, Malhotra S, Puri GD, Pandhi P. Drug utilization pattern in the intensive care unit of a tertiary care hospital. *J Clin Pharmacol* 2006;46(8):945-51.
43. Lima RE, De Bortoli Cassiani SH. Potential drug interactions in intensive care patients at a teaching hospital. *Rev Lat Am Enfermagem* 2009;17(2):222-7.
44. Reis AM, de Carvalho RE, de Faria LM, et al. [Prevalence and clinical significance of interactions drug-enteral nutrition in Intensive Care Units]. *Rev Bras Enferm* 2014;67(1):85-90.
45. World Health Organization. ATC/DDD index 2018. Geneva: WHO, 2018.
46. Vonbach P, Dubied A, Krahenbuhl S, et al. Evaluation of frequently used drug interaction screening programs. *Pharm World Sci* 2008;30(4):367-74.

# BMJ Open

## Feeding tube-related incidents in hospitalized patients: a study protocol of a multicenter prospective cohort study

|                                 |                                                                                                                                                                                                                                                                                                                                                                                                                                                                                                                                                                                                                                               |
|---------------------------------|-----------------------------------------------------------------------------------------------------------------------------------------------------------------------------------------------------------------------------------------------------------------------------------------------------------------------------------------------------------------------------------------------------------------------------------------------------------------------------------------------------------------------------------------------------------------------------------------------------------------------------------------------|
| Journal:                        | <i>BMJ Open</i>                                                                                                                                                                                                                                                                                                                                                                                                                                                                                                                                                                                                                               |
| Manuscript ID                   | bmjopen-2018-027967.R1                                                                                                                                                                                                                                                                                                                                                                                                                                                                                                                                                                                                                        |
| Article Type:                   | Protocol                                                                                                                                                                                                                                                                                                                                                                                                                                                                                                                                                                                                                                      |
| Date Submitted by the Author:   | 09-May-2019                                                                                                                                                                                                                                                                                                                                                                                                                                                                                                                                                                                                                                   |
| Complete List of Authors:       | Gimenes, Fernanda; University of São Paulo at Ribeirão Preto College of Nursing, General and Specialized Nursing<br>Pereira, Marta; University of São Paulo at Ribeirão Preto College of Nursing, General and Specialized Nursing<br>Prado, Patricia; Universidade Federal do Acre<br>Carvalho, Rhanna; Ceara State Univeristy<br>Koepp, Janine; Universidade de Santa Cruz do Sul<br>Freitas, Ligia; Faculty of Science and Technology of Campos Gerais<br>Teixeira, Thalyta; Universidade Paulista (UNIP), Nursing<br>Miasso, Adriana; University of São Paulo at Ribeirão Preto College of Nursing, Psychiatric Nursing and Human Sciences |
| <b>Primary Subject Heading</b>: | Health services research                                                                                                                                                                                                                                                                                                                                                                                                                                                                                                                                                                                                                      |
| Secondary Subject Heading:      | Epidemiology, Nursing                                                                                                                                                                                                                                                                                                                                                                                                                                                                                                                                                                                                                         |
| Keywords:                       | adverse effects, enteral nutrition, intubation, gastrointestinal, nasogastric intubation                                                                                                                                                                                                                                                                                                                                                                                                                                                                                                                                                      |
|                                 |                                                                                                                                                                                                                                                                                                                                                                                                                                                                                                                                                                                                                                               |

SCHOLARONE™  
Manuscripts

1  
2  
3 **Feeding tube-related incidents in hospitalized patients: a study protocol of a**  
4 **multicenter prospective cohort study**

5  
6 F R E Gimenes, <sup>1</sup> M C A Pereira, <sup>1</sup> P R Prado, <sup>2</sup> R E F L Carvalho, <sup>3</sup> J Koepp, <sup>4</sup> L M Freitas,  
7  
8 <sup>5</sup> T C A Teixeira, <sup>6</sup> A I Miasso<sup>1</sup>  
9

10  
11 **Author affiliations**

12 <sup>1</sup>University of São Paulo at Ribeirão Preto College of Nursing, WHO Collaborating Centre for  
13 Nursing Research Development, São Paulo, Brazil.

14 <sup>2</sup>Federal University of Acre, Acre, Brazil.

15 <sup>3</sup>Ceará State University, Ceará, Brazil.

16 <sup>4</sup>University of Santa Cruz do Sul, Rio Grande do Sul, Brazil.

17 <sup>5</sup>Faculty of Science and Technology of Campos Gerais (FACICA), Minas Gerais, Brazil.

18 <sup>6</sup>Paulista University (UNIP), Campinas, Brazil  
19  
20  
21  
22  
23  
24  
25

26 **Corresponding Author**

27 Fernanda R.E. Gimenes

28 Avenida Bandeirantes 3900, Monte Alegre, Ribeirão Preto, São Paulo, Brazil

29 Phone number: 55-16-3315-3420. Fax number: 55-16-3315-0518.

30 fregimenes@eerp.usp.br  
31  
32  
33  
34

35 **Keywords:** adverse effects; enteral nutrition; intubation, gastrointestinal; nasogastric  
36 intubation  
37

38 **Word count:** 4,294  
39  
40  
41  
42  
43  
44  
45  
46  
47  
48  
49  
50  
51  
52  
53  
54  
55  
56  
57  
58  
59  
60

## ABSTRACT

**Introduction:** Hospitalized patients with feeding tube are at constant risk of incidents; therefore, health professionals need to routinely monitor risks and adopt strategies for patient safety and quality of care.

**Aim:** To evaluate the feeding tube-related incidents in hospitalized patients and associated factors.

**Methods:** This is a multicenter study, with a multicenter prospective cohort design. Data will be collected at the general medical ward of seven Brazilian hospitals in the North, Northeast, Southeast, and South. The sample will consist of 391 patients that require a feeding tube during hospitalization. Three different methods will be used to identify the incidents: (1) healthcare professionals and patients/caregivers will be required to report any feeding tube-related incidents; (2) researchers will visit the wards to get information about the incidents with healthcare professionals and patients/caregivers; (3) the researchers will review the medical records looking for information on the occurrence of any feeding tube-related incidents. Demographic, clinical and therapeutic details will be obtained from the medical records and will be registered in an electronic data collection tool developed for the purposes of this study. The complexity of patients will be assessed by the Patient Classification System, and the severity of comorbid diseases, through the Charlson Comorbidity Index.

**Implication for practice:** The results may encourage the use of evidence effectively to influence the scientific foundation for clinical practice and the development of evidence-based policies that will prevent, manage and eliminate complications caused by feeding tube-related incidents, and improve the quality and safety of care provided to hospitalized patients.

**Ethics and dissemination:** The study has been approved by the Research Ethics Committee. Detailed information about the study can be provided by the principal investigator. The findings will be reported through academic journals, seminar and conference presentations, social media, print media, the internet, and community/stakeholder engagement activities.

### Strengths and limitations of this study

- Several single-center studies have identified the prevalence of feeding-tube related incidents in general inpatients, however, there are no studies reporting on those incidents across multiple hospital sites and at a national level.
- A multicenter study may ascertain better generalizability of the data.
- To our knowledge, this is the first large scale study in Brazil and in Latin America documenting the incidence of feeding-tube related incidents in internal medicine wards.

- Although voluntary reporting can detect a broad range of incidents, this system misses the vast majority of incidents and cannot provide stable estimates of the true underlying causes.
- It is difficult to demonstrate causality between feeding tube-related incidents and negative patient outcomes due to a number of confounding factors.

For peer review only

## INTRODUCTION

During hospitalization, patients with advanced disease have caloric and protein malnutrition, and require nutritional and drug interventions. Therefore, these patients often need feeding tube to ensure that their daily nutritional and medical needs are met. <sup>1</sup> Data from the American Society for Enteral and Parenteral Nutrition (ASPEN) revealed that more than 245,000 patients per year require at least a temporary feeding tube during a hospital stay, along with another nearly 31,000 patients that are on enteral nutrition at home. <sup>2</sup> In the United States, about one million feeding tubes are introduced in adults and children each year <sup>3</sup> and the rate of complications is 2% to 36%. <sup>4-6</sup>

Although inserting a feeding tube is a relatively innocuous procedure, improper positioning can cause severe and fatal complications. <sup>7-9</sup> One of the major incidents related to feeding tube is the wrong connection. The design of these devices is such that it is possible to infuse enteral feeding and/or medications via an unwanted route, such as intravenous route. <sup>10,11</sup>

It is also common to have inadvertent positioning of the tube in the respiratory tract, resulting in bronchoaspiration and pneumothorax. <sup>8,12-14</sup> Pulmonary aspiration occurs in 2% to 10% of patients receiving enteral feeding. The inadvertent insertion of the tube into the tracheal tree results in discomfort for the patient, delayed feeding, increased morbidity and mortality, and length of hospital stay, resulting in added burdens for the institution and patients. <sup>5,15</sup> Therefore, health care professionals need to routinely monitor risks and adopt strategies aimed at patient safety.

Other incidents may occur during the insertion and/or progression of a feeding tube through the gastrointestinal tract, such as sinusitis, vomiting, nasopharyngeal discomfort, erosion of the nasal septum, epistaxis, and blood return by the tube during guidewire withdrawal. <sup>16</sup> In Brazil, this data is not available, however, it is observed that feeding tube is a common procedure in most Brazilian health institutions. <sup>17</sup>

Regarding medication administration, administering drugs with absorption at the intestinal level in patients using a feeding tube is a challenge. As demonstrated in the literature, some drugs should never be crushed and administered through a feeding tube because they have enteric or controlled release protection coatings. <sup>18</sup> The grinding process of these drugs can destroy the coating film and result in incidents, exposing patients to unnecessary risks. <sup>19</sup> In this regard, experts argue that healthcare professionals should not assume that a drug formulated to be administered orally can be administered safely through a feeding tube because drug delivery mechanisms can be altered or destroyed, reducing effectiveness or increasing risk of toxicity. <sup>20</sup>

In order to achieve adequate clinical outcomes in hospitalized patients, it is essential that medication and enteral nutrition be administered appropriately. However, nursing

1  
2  
3 guidelines on enteral feeding tube care are not based on scientific evidence, but on traditions,  
4 rituals and expert opinions, exposing patients to unnecessary harm.<sup>21</sup>  
5

6 Although feeding tube-related incidents are common in hospital settings with significant  
7 morbidity and mortality, the issue has not been extensively studied, especially in developing  
8 countries. Given that the number of patients with chronic conditions have increased  
9 significantly worldwide, as well as in Brazil, it is critical that health care professionals employ  
10 a repertoire of evidence based on interventions in order to provide safe and high quality care.  
11  
12  
13  
14  
15  
16  
17  
18  
19  
20  
21  
22  
23  
24  
25  
26  
27  
28  
29  
30  
31  
32  
33  
34  
35  
36  
37  
38  
39  
40  
41  
42  
43  
44  
45  
46  
47  
48  
49  
50  
51  
52  
53  
54  
55  
56  
57  
58  
59  
60

22,23 However, there is a knowledge gap regarding the safe handling of feeding tubes in  
Brazilian healthcare institutions. Studies that aim to identify the most frequent feeding tube-  
related incidents that occurred during hospital stays, can reduce that gap and the risks of  
complications and lower overall cost of care.

The results of the study will contribute to the production of knowledge and its  
application in clinical practice for harm reduction towards a safer environment for patient care;  
will provide national and international data that reflect the problem of feeding tube-related  
incidents in acute care units; and will contribute to the use of the evidence in an efficient way  
to influence the development of national practices and policies aimed at managing the risks  
associated with the feeding tube.

### **Significance and theoretical framework**

Feeding tubes may be used long-term (ie., gastrostomy or jejunostomy) or short-term with  
distal tips positioned in the stomach (ie., nasally placed gastric tube) or small intestine (ie.,  
nasally placed small-bowel feeding tube).<sup>24</sup> Long-term feeding tubes are not part of the scope  
of this study and, therefore these enteral access devices will not be addressed.

These devices are not exclusively used for administration of enteral nutrition. They are  
also frequently used for administering drugs. The consequence of this duo use is the increased  
risk of tube obstructions, physical-chemical incompatibilities, and potential drug-nutrient  
interactions.<sup>25</sup> In a previous study, researchers found that 74% of nurses employed wrong  
medication administration methods to deliver medicines through feeding tubes and those  
errors could reduce the effects of drugs and lead to unsuccessful treatments.<sup>26</sup>

According to a study conducted in a Brazilian private hospital, the main reason for the  
loss of a feeding tube was obstruction (36%) related to wrong medication preparation and  
administration techniques.<sup>27</sup> Estimates of incidence of clogged feeding tubes range widely  
from 12.5%-45%, but it is undisputed that they result in increased costs for patients and  
institutions.<sup>28</sup> Thus, health care practitioners, especially nurses, should not assume that a  
medication intended to be taken by mouth can be safely administered through a feeding tube,  
because this misconception can result in harm to patients and increase medical costs to  
society.<sup>21</sup>



1  
2  
3 Another incident related to improper medication administration via a feeding tube is  
4 caused by drug-drug interactions in older people due to polypharmacy, with a prevalence of  
5 20-40%. Polypharmacy increases the complexity of clinical management and contributes to  
6 medication adverse events.<sup>29</sup>  
7  
8

9 Therefore, the causes of the incidents are multifaceted and the consequences are  
10 associated with increasing complexity of patients and treatments, intensifying the need for  
11 measures aimed at improving the quality of care. For this reason, opportunities to share  
12 knowledge are fundamental to patient safety.<sup>30</sup>  
13  
14

15 Efforts to overcome these problems have resulted in the development of international  
16 programs and policies. For instance, the WHO proposed the patient safety research cycle and  
17 the first step in improving care quality and safety is to measure the occurrence of incidents in  
18 order to know the magnitude of the problem. The WHO then suggests understanding the  
19 causes and identifying solutions.<sup>31</sup>  
20  
21

22 In Brazil, the Ministry of Health and the National Health Surveillance Agency (ANVISA),  
23 in line with WHO's global initiatives, launched the National Patient Safety Program in mid-April  
24 2013 with the aim of promoting strategies aimed at prevention and reduction of risks  
25 associated with health care. Among the strategies were increasing patient safety research.  
26  
27  
28  
29  
30  
31  
32  
33  
34  
35  
36  
37  
38  
39  
40  
41  
42  
43  
44  
45  
46  
47  
48  
49  
50  
51  
52  
53  
54  
55  
56  
57  
58  
59  
60

The present study is necessary when considering the fact that patient safety is a global  
problem affecting countries at all levels of development;<sup>34</sup> the production of knowledge and  
its application in clinical practice can promote a safe environment for the provision of care,  
and in Brazil, there is concern about the need to increase knowledge on this issue and there  
are insufficient national data that reflect the problem of the incidents related to feeding tubes  
in hospitalized patients. We expect that the results of this study will provide high quality  
evidence that will support interventions designed to improve patient safety.

The objective of this study is to evaluate the feeding tube-related incidents in  
hospitalized patients and associated factors. The secondary objectives are:

1. To analyse the association between the feeding tube-related incidents and the complexity of the patients;
2. To analyze the association between the feeding tube-related incidents and the severity of comorbid diseases;
3. To examine the predictive role of Charlson Comorbidity Index (CCI) on mortality of patients with a feeding tube;
4. To assess potential drug-drug interactions (pDDI) in patients with a feeding tube and its association with patient complexity and comorbid diseases.

## METHODS

## Research Design

This is a multicenter study, with a prospective cohort design.

## Setting

Seven centers across Brazil will participate in this study; the centers include a mix of community and university hospitals, hospitals with and without residency programs, and public and private hospitals; they also vary in size. The hospitals will be as follows: Acre Hospital of Clinics - HCA, General Hospital of Fortaleza - HGF, Hospital of Clinics of the Medical School of Ribeirão Preto of the University of São Paulo - HCFMRP-USP, Américo Brasiliense State Hospital - HEAB, Sumaré State Hospital - HES, São Vicente de Paulo Hospital - HSVP, and Santa Cruz Hospital - HSCRGs.

The medical wards of these hospitals were chosen for this study because many adult patients in these wards have chronic conditions and require enteral nutrition and medications through a feeding tube.

## Subjects

The study population will be the patients admitted to the medical ward of the seven Brazilian hospitals that require a feeding tube during hospitalization. The inclusion criteria are: patients older than 18 years; who are admitted to the medical ward with a short-term feeding tube (nasally placed gastric tube or a nasally placed small-bowel feeding tube); patients who required the insertion of a short-term feeding tube during hospitalization; and patients that have been hospitalized for at least 24 hours. Patients meeting the above inclusion criteria who are re-admitted during the study period will be only counted for their first admission. Patients with nasogastric aspiration will be also excluded from this study.

Sampling size was determined by a stratified random sampling with proportional allocation by strata, where each stratum is formed by the floors / units of each hospital (Table 1):

**Table 1.** Determination of sample size, 2018

| Hospital / Strata | Number of inpatients | Prevalence of patients with feeding tube | Estimated size of each stratum |
|-------------------|----------------------|------------------------------------------|--------------------------------|
| HCA               | 980                  | 0.1908                                   | 58                             |
| HGF               | 192                  | 0.1563                                   | 11                             |
| HCFMRP-USP        | 2247                 | 0.0788                                   | 134                            |
| HEAB              | 783                  | 0.1073                                   | 47                             |
| HES               | 1991                 | 0.1828                                   | 119                            |
| HSVP              | 323                  | 0.0650                                   | 19                             |

|        |    |        |   |
|--------|----|--------|---|
| HSCRGS | 48 | 0.0324 | 3 |
|--------|----|--------|---|

The formula for the calculation of the sample size is given by:

$$n = \frac{z_{\alpha/2}^2 N(1-P)}{\varepsilon^2 P(N-1) + z_{\alpha/2}^2 (1-P)} \quad (1)$$

,where P represents the prevalence of the event of interest

(column 4 of table 1),  $z_{\alpha/2}$  represents the level of significance adopted and  $\varepsilon$  is the relative sampling error. If the sample size calculated by the expression given in (1) is greater than 20% of the population the following finite correction procedure is adopted:

$$nc = \frac{n}{(1 + n/N)} \quad (2),$$

where N is the total size of the study population and n is the value obtained

in (1). The sample was allocated proportionally among the H strata according to the formula:

$$n_h = n \frac{N_h}{N}$$

, where N is the total population of hospitalized patients (N = 6,564), and  $N_h$  is the total of each stratum H. Population totals are found in the second column of Table 1. Adopting the parameters of relative error of 20%, level of significance of 5% and the total population of 6,564, a total sample size of 391 patients was calculated. The required sample sizes of each strata are found in the last column of Table 1.

### Instruments

Data collection tools will be composed of three virtual forms which will be developed by the research team and assessed for face and content validity by a panel of experts. The forms will be developed in Portuguese and an online platform (Survey Monkey®) will be used.

The experts will be selected through the analysis of existing curricula in the database of the Brazilian National Council for Scientific and Technological Development (CNPq) and will be invited to participate in the study, by invitation letter sent by electronic mail. Then the access links to the electronic forms will be made available for the experts to carry out their analysis; the experts will have up to 30 days to evaluate the electronic forms and give their feedback to the researchers. The modified forms will be tested through a pre-test, where the forms will be applied to five hospitalized patients from the first day of use of a feeding tube until patient discharge.

At admission, demographic, clinical, and therapeutic information will be recorded in the first electronic data collection form, including:

- ✓ *Demographic data*: registration number; date of admission to the ward / unit; date of birth; city / state of origin; gender; race; marital status; education level; profession; origin of the referral.

- 1  
2  
3  
4  
5  
6  
7  
8  
9  
10  
11  
12  
13  
14  
15  
16  
17  
18  
19  
20  
21  
22  
23  
24  
25  
26  
27  
28  
29  
30  
31  
32  
33  
34  
35  
36  
37
- ✓ *Clinical data*: principal and secondary International Classification of Diseases (ICD); comorbidities; the final score of the Patient Classification System (PCS); <sup>35</sup> level of consciousness measured by Glasgow Coma Scale (GCS).
  - ✓ *Therapeutic data*: data related to the short-term feeding tube (time to insertion; type; gauge; location [gastric or small-bowel]; methods used to confirm feeding tube placement and the results of the methods used); data related to the enteral nutrition (type, total volume in 24 hours, frequency of administration); data related to the medications prescribed (drug name; dosage form; dose; route of administration; frequency of administration; and planned / scheduled administration time).

The second electronic data collection form will include variables related to the incidents:

- ✓ *Incident*: date and time of occurrence; type of incident (mechanic; gastrointestinal; infectious; and others); <sup>4</sup> consequence of the incident for the patient, according to the WHO (none; mild; moderate; severe; and fatal); <sup>36</sup> measures adopted after the incident; sources of information on the occurrence of the incident; and means of obtaining information about the incident.
- ✓ *Clinical*: principal and secondary ICD; comorbidities; the final score of the PCS; <sup>35</sup> level of consciousness measured by GCS.
- ✓ *Therapeutic*: data related to the enteral nutrition (type, total volume in 24 hours, frequency of administration); data related to the medications prescribed (drug name; dosage form; dose; route of administration; frequency of administration; and planned / scheduled administration time).

The third electronic data collection form will include variables related to the start of feeding tube and patient follow-up:

- ✓ *Clinical*: date of the start of the feeding tube use; principal and secondary ICD; comorbidities; the final score of the PCS; <sup>35</sup> level of consciousness measured by GCS.
- ✓ *Therapeutic*: data related to the medications prescribed 24 hours after feeding tube insertion (or 24 hours after admission if the patient is admitted at the unit with a feeding tube); medications prescribed 120 hours after feeding tube insertion (or 120 hours after admission if the patient is admitted at the unit with a feeding tube); and medications prescribed 24 hours before patient discharge.
- ✓ Date of programmed feeding tube removal and the main reason; date and time of patient discharge; reason for patient discharge.

## Procedures

This study will be completed in 24 months. At each center, a registered nurse in the medical ward and a research assistant will serve as a liaison to the study investigators; a designated

1  
2  
3 nurse coordinator will ensure that the collection of data will be carried out completely and  
4 correctly. The liaison nurse and the research assistant at each center will attend a total of 16  
5 hours of theoretical and practical formal training sessions led by the regional study coordinator,  
6 at which the overall study design will be presented and each electronic data collection forms  
7 will be explained. The study protocol will neither mandate nor direct any element of patient  
8 care, and thus will pose no risk to patients.  
9

10  
11  
12 A data collection guideline will be developed with the purpose of standardizing data  
13 recording in the seven hospitals participating in the study. This guideline will consist of general  
14 information related to the research project; general instructions on how to access the  
15 electronic data collection forms using mobile devices; definition of each variable and additional  
16 information for completing the variables that make up the three electronic data collection  
17 forms. The guideline will be available on printed version and by e-mail to assist all the research  
18 team on data collection.  
19

20  
21  
22 Before data collection starts, the researchers will identify the patients who will start the  
23 use of a short-term feeding tube during hospitalization, according to the inclusion criteria  
24 proposed for this study. In Brazilian hospitals, short-term feeding tubes are performed by  
25 registered nurses.  
26

27  
28  
29 Researchers will explain the research objectives and will ask patients, or their legal  
30 guardians, to voluntarily sign the Informed Consent Form.  
31

32  
33 For purposes of confidentiality, each patient will be identified by a unique identifying  
34 number; data will be collected from the moment a patient starts using a short-term feeding  
35 tube until the patient is discharged (due to death or non-death).  
36

37  
38 Using a mobile device, research assistants will collect demographic data at patient  
39 admission, and prospectively record clinical and therapeutic data from the patients' medical  
40 record. Considering that four hospitals participating in this study have present electronic  
41 medical records, these will be accessed in the computers available in the medical wards /  
42 units. In both situations, the researchers will request permission from the nurse responsible  
43 for the unit to access the computers, and to record the information in the electronic data  
44 collection forms. The consultation of the medical records will occur in the afternoon or at night,  
45 because these are the periods with the least movement of people.  
46  
47  
48  
49  
50  
51

### 52 *Assessment of the complexity of patients with feeding tube*

53 Patient complexity will be assessed by an experienced nurse, member of the research team,  
54 on the first day of feeding tube use, on the day of the incident, and weekly until patient  
55 discharges. Nurses will have up to 24 hours to complete their evaluation.  
56

57 For this purpose, the PCS proposed by Fugulin <sup>35</sup> will be used. The PCS is  
58 recommended by the Federal Nursing Council, Brazil, <sup>37</sup> and it was developed to classify  
59  
60

1  
2  
3 patients according to the degree of dependence of the nursing team. This instrument has nine  
4 critical indicators: mental state, oxygenation, vital signs, motility, ambulation, feeding, body  
5 care, elimination and therapeutics. Therefore, the scores are distributed in five categories that  
6 correspond to the complexity of the assistance: minimum (scores of 9-14), intermediate  
7 (scores of 15-20), high-dependency (scores of 21-26), semi-intensive (scores of 27-31), and  
8 intensive care (scores > 31).  
9  
10  
11  
12

#### 13 *Assessment of the severity of comorbid diseases of patients with feeding tube*

14 Regarding the severity of comorbid diseases, this will be evaluated on admission at the  
15 medical ward / unit; on the first day of use of the short-term feeding tube; on the day of the  
16 incident; and weekly until patient discharges. For this purpose, the Charlson Comorbidity Index  
17 (CCI)<sup>38</sup> will be used. The CCI is the most widely used comorbidity, which is a method of  
18 categorizing patients' comorbidities, according to the ICD. The aim of the CCI is to measure  
19 the severity of the patient, regardless of the main diagnosis, and therefore, to predict the one-  
20 year mortality of patients. The final score is the result of the sum of the weights assigned to  
21 the comorbidities recorded as secondary diagnoses; the higher the score, the greater the risk  
22 of the patient dying. It should be noted that the CCI will be adjusted according to the patient's  
23 age, so that, from the age of 50, a point will be added to the final score for every decade of  
24 life.<sup>38</sup>  
25  
26  
27  
28  
29  
30  
31  
32

33 Based on the final CCI score, patients will be divided into three groups: mild (with CCI  
34 scores of 1–2); moderate (with CCI scores of 3–4); and severe (with CCI scores  $\geq 5$ ). In  
35 addition, survival time in days will be calculated from the first day patient start using a feeding  
36 tube during hospital stay to the death of a patient.<sup>39</sup>  
37  
38  
39  
40

#### 41 *Assessment of the feeding tube-related incidents*

42 In this study, incident was defined as an event or circumstance that could have resulted, or  
43 did result, in unnecessary harm to a patient.<sup>36</sup> The feeding tube-related incidents considered  
44 in this study are:  
45  
46

- 47 ✓ Mechanical incident (unplanned / accidental removal; obstruction; displacement /  
48 migration; epistaxis; nasal mucosa edema; perforation or stenosis of the esophagus;  
49 perforation of the brain; pneumothorax; various attempts to introduce the tube).
- 50 ✓ Gastrointestinal incident (nausea / vomiting; diarrhea; constipation; colic / abdominal  
51 distension / flatulence).
- 52 ✓ Infection (aspiration pneumonia; gastroenterocolitis).
- 53 ✓ Other incidents (skin lesion associated with the feeding tube insertion;  
54 bronchoaspiration; wrong connection; quality of the tube material).

55 Based on previous studies,<sup>40,41</sup> three methods will be used for incidents detection:  
56  
57  
58  
59  
60

- (1) Prompted spontaneous reporting: healthcare professionals (nursing and medical staff) and patients / caregivers will be continuously prompted to report any feeding tube-related incidents to the investigators. A pen and a booklet containing instructions on incident reporting will be available and remain at the bedside of each patient participating in the study;
- (2) Researchers will visit the wards / units at least twice a week to request information about the incidents, along with healthcare professionals (nursing and medical staff) and patients / caregivers;
- (3) Researchers will review the booklet and medical records at least twice a week to obtain information about feeding tube-related incident.

Using a mobile device, the research assistant will record data related to the incidents in the electronic data collection form developed for this purpose. More than one incident may occur on the same day and/or at the same time (eg. tube obstruction and unplanned removal), thus each incident will be recorded on a different form, resulting in a form filled for each incident.

#### *Assessment of potential drug-drug interactions in patients with feeding tube*

Regarding the analysis of potential drug-drug interactions, it will be performed only in patients with a hospital stay of at least five days, because longer hospital stays are associated with the likelihood of adverse drug events.<sup>42</sup>

The research assistants will record on electronic data collection forms all medications and enteral nutrition prescribed for patients, regardless of whether they were administered or not. Data related to the medications will be collected in the following moments of hospitalization: at admission; 24 hours and 120 hours after admission because it is the period of greatest therapeutic adjustment<sup>43-45</sup>. Data related to medications will also be recorded 24 hours before patient discharge and on the day of the incident. Data related to enteral nutrition will be recorded on admission and on the day of the incident.

Medications will be classified according to the WHO Chemical Anatomical Therapeutic Classification (ATC),<sup>46</sup> and the analysis of drug interactions will be performed based on drug monographs from the Drug Reax System database from Thomson Healthcare® because it is a highly reliable software.<sup>47</sup> The software is also available in the journal portal of the Coordination of Improvement of Higher-Level Personnel - CAPES, Brazil. Potential drug-drug interactions will be classified according to the speed of action, documentation and severity, as recommended by Drug Reax®.

#### **Data analysis**

1  
2  
3 Data will be downloaded from the Survey Monkey® to a computer file and analyzed using the  
4 Statistical Package for the Social Program Sciences® (SPSS) version 25.0. In the statistical  
5 analysis, we will apply: calculation of proportions and measures of central tendency and  
6 variability. Quantitative variables will be assessed for normal distribution using the  
7 Kolmogorov-Smirnov test. The importance of the normal distribution evaluation is justified,  
8 among others, by the subsequent indication of parametric and non-parametric statistical tests.  
9 Pearson's Chi-square ( $\chi^2$ ) and Fisher's exact tests will be used to compare the response  
10 variables with the categorical explanatory variables, when indicated. For the comparison of  
11 the variable responses with the quantitative explanatory variables, t or Mann-Whitney tests  
12 will be performed, when indicated.

13  
14 To examine the predictive role of Charlson Comorbidity Index (CCI) on mortality of  
15 patients having feeding tubes, a one-way analysis of variance (ANOVA) will be used to  
16 compare group differences stratified by CCI, and otherwise Chi-square tests will be applied.  
17 All analysis will be carried out considering a significance level of 5% ( $\alpha = 0,05$ ).

### 18 19 20 21 22 23 24 25 26 27 **Patient and Public Involvement**

28 Although patients were not involved in the setting of the research questions or the outcome  
29 measures, participants will be informed of the project aims and asked to voluntarily sign the  
30 consent form. They will be informed of possible risks which are: discomfort or embarrassment  
31 when answering questions about feeding tube-related incidents, thus participants will be able  
32 to refuse to answer any question that he/she feels inconvenient or inappropriate, without  
33 causing harm to their care. In addition, participants will be informed that the results will be  
34 used for possible publications and we will guarantee their confidentiality and anonymity.

### 35 36 37 38 39 40 41 **Ethics and Dissemination**

42 The study was approved by the Research Ethics Committee of the University of São Paulo at  
43 Ribeirão Preto College of Nursing, according to the Resolution No. 466/2012, of the National  
44 Council of Ethics in Research of the Brazilian Ministry of Health, which addresses research  
45 ethics with humans (CAAE: 56166016.1001.5393). Written informed consent will be obtained  
46 from each patient, or their guardian, prior to enrollment in the study. No personally identifiable  
47 information will be collected in order to maintain the anonymity of the participants and they will  
48 be informed that the results will be used for possible publications.

49 The results will be reported to the hospitals and the findings may contribute to the  
50 hospital's policies and procedures to reduce the risks for feeding tube related incidents and to  
51 improve the quality of care and patient safety. There is very little information about feeding  
52 tube related incidents in developing countries, so this study will provide important information  
53 about risk levels. Results will also be reported through academic journals and conference



1  
2  
3 presentations, social media (ie, Facebook, Twitter), print media (ie, Patient Safety Alert), the  
4 internet (ie, links to study reports on the Patient Safety Research Group website), and  
5 community/stakeholder engagement activities (ie, community forums, stakeholder meetings).  
6 The project team includes academic researchers, hospital clinicians and experts involved in  
7 patient safety. This provides the project with access to a range of other conduits through which  
8 to disseminate results to, for example, policymakers and system implementers.  
9  
10  
11  
12  
13

#### 14 **Funding**

15 This research received no specific grant from any funding agency in the public, commercial or  
16 not-for-profit sectors.  
17  
18

#### 19 **Competing interests**

20 None declared.  
21  
22  
23

#### 24 **Patient Consent**

25 Obtained.  
26  
27  
28  
29

#### 30 **Ethics approval**

31 The study was approved by the Research Ethics Committee of the University of São Paulo at  
32 Ribeirão Preto College of Nursing (CAAE: 56166016.1001.5393).  
33  
34  
35

#### 36 **Provenance and peer review**

37 Not commissioned; externally peer reviewed.  
38  
39  
40

41 **Contributorship statement:** FREG and MCAP initiated the project and are the chief  
42 investigators on the project; they made substantial contributions to the conception and design  
43 of the work. PRP, REFLC, JK, LMF, TCAT, and AIM, are associate investigators and all made  
44 significant contributions to the protocol in their specific areas of expertise. FREG prepared the  
45 first draft of this protocol and all authors have reviewed, provided input and gave final approval  
46 of the version published.  
47  
48  
49  
50

#### 51 **References**

- 52 1. Gimenes FRE, Anacleto TA. [*Medication preparation and administration through*  
53 *feeding tubes and ostomy*] [press release]. Belo Horizonte: Boletim ISMP Brasil, 2015.
- 54 2. Grant M, Martin S. *Delivery of enteral nutrition*. Advanced Practice in Acute & Critical  
55 Care: AACN Clinical Issues, 2000.  
56  
57  
58  
59  
60

- 1  
2  
3 3. Krenitsky J. Blind bedside placement of feeding tubes: treatment or threat? . *Practical Gastroenterology* 2011;32-42.
- 4  
5  
6 4. Blumenstein I, Shastri YM, Stein J. Gastroenteric tube feeding: techniques, problems  
7 and solutions. *World J Gastroenterol* 2014;20(26):8505-24.
- 8  
9 5. Figueredo LP. [*Complications of enteral nutritional therapy (NER) and associated*  
10 *factors in hospitalized patients*]. São Paulo: Universidade de São Paulo, 2011.
- 11  
12 6. Stayner JL, Bhatnagar A, McGinn AN, Fang JC. Feeding tube placement: errors and  
13 complications. *Nutr Clin Pract* 2012;27(6):738-48.
- 14  
15 7. American Association of Critical-Care Nurses. *AACH practice alert: verification of*  
16 *feeding tube placement* [press release]. Aliso Viejo (CA): AACN, 2009.
- 17  
18 8. Amirlak B, Amirlak I, Awad Z, Zahmatkesh M, Pipinos I, Forse A. Pneumothorax  
19 following feeding tube placement: precaution and treatment. *Acta Med Iran* 2012;50(5):355-8.
- 20  
21 9. Arnau Alfonso JJ. [Methods for determining the correct location of a nasogastric tube  
22 after its insertion in adults patients]. *Enferm Clin* 2013;23(2):81-3.
- 23  
24 10. Sorokin R, Gottlieb JE. Enhancing patient safety during feeding-tube insertion: a  
25 review of more than 2,000 insertions. *J Parenter Enteral Nutr* 2006;30(5):440-5.
- 26  
27 11. Millin CJ, Brooks M. Reduce--and report--enteral feeding tube misconnections.  
28 *Nursing* 2010;40(11):59-60.
- 29  
30 12. Metheny NA, Meert KL, Clouse RE. Complications related to feeding tube placement.  
31 *Curr Opin Gastroenterol* 2007;23(2):178-82.
- 32  
33 13. Waitzberg D, Enck C, Miyahira N, Mourão J, Faim M, Oliseski M, et al. [*Nutrition*  
34 *Therapy: quality indicators*]. São Paulo: Project Guidelines; Brazilian Medical Association;  
35 Federal Council of Medicine, 2011.
- 36  
37 14. Pillai JB, Vegas A, Brister S. Thoracic complications of nasogastric tube: review of safe  
38 practice. *Interac Cardiovasc Thorac Surg* 2005;4(5):429-33.
- 39  
40 15. Gilbert RT, Burns SM. Increasing the safety of blind gastric tube placement in pediatric  
41 patients: the design and testing of a procedure using a carbon dioxide detection device. *J*  
42 *Pediatr Nurs* 2012;27(5):528-32.
- 43  
44 16. Kuo YW, Yen M, Fetzer S, Lee JD. Reducing the pain of nasogastric tube intubation  
45 with nebulized and atomized lidocaine: a systematic review and meta-analysis. *J Pain*  
46 *Symptom Manage* 2010;40(4):613-20.
- 47  
48 17. Ferreira AM. [Nasogastric and nasoenteric feeding tubes: how may the discomfort  
49 during placement be reduced?]. *Rev Esc Enferm USP* 2005;39:358-9.
- 50  
51 18. Mitchell JF. *Oral dosage forms that should not be crushed*. Institute for Safe Medication  
52 Practices – ISMP, 2014.
- 53  
54  
55  
56  
57  
58  
59  
60

19. van den Bemt P, Cusell MBI, Overbeeke PW, Trommelen M, van Dooren D, Ophorst WR, et al. Quality improvement of oral medication administration in patients with enteral feeding tubes. *Qual Saf Health Care* 2006;15(1):44-7.
20. Grissinger M. Preventing errors when drugs are given via enteral feeding tubes. *P t* 2013;38(10):575-6.
21. Simons SR, Abdallah LM. Bedside Assessment of enteral tube placement: aligning practice with evidence. *Am J Nurs* 2012;112(2):40-6.
22. Brazil. [Strategic actions plan for coping with chronic noncommunicable diseases (CNCD) in Brazil 2011-2022]. Brasília: Ministry of Health, Secretariat of Health Surveillance, Department of Health Situation Analysis, 2011.
23. World Health Organization. *Global status report on noncommunicable diseases 2014*. Geneva: World Health Organization, 2014.
24. Lord LM. Enteral access devices: types, function, care, and challenges. *Nutr Clin Pract* 2018;33(1):16-38.
25. Heydrich J, Heineck I, Bueno D. Observation of preparation and administration of drugs by nursing assistants in patients with enteral feeding tube. *Braz J Pharm Sci* 2009;45:117-20.
26. Emami S, Hamishehkar H, Mahmoodpoor A, et al. Errors of oral medication administration in a patient with enteral feeding tube. *J Res Pharm Pract* 2012;1(1):37-40.
27. Pereira SRM, Coelho MJ, Mesquita AMFd, et al. Causes for the unplanned removal of the feeding tube in intensive care. *Acta Paul Enf* 2013;26:338-44.
28. Fisher C, Blalock B. *Clogged feeding tubes: a clinician's thorn*. In: Parrish CR, editor. *Practical Gastroenterology* 2014.
29. Palleria C, Di Paolo A, Giorè C, et al. Pharmacokinetic drug-drug interaction and their implication in clinical management. *J Res Med Sci* 2013;18(7):601-10.
30. Hoffmann B, Beyer M, Rohe J, et al. "Every error counts": a web-based incident reporting and learning system for general practice. *Qual Saf Health Care* 2008;17(4):307-12.
31. World Health Organization. *Patient safety research: a guide for developing training programmes*. Geneva: WHO, 2012.
32. Brazil. [Ordinance No. 529, of April 1, 2013. Establishes the National Patient Safety Program (PNSP)]. Brasília, DF: Diário Oficial da União, 2013.
33. Brazil. [Reference Document for the National Patient Safety Program]. In: Ministry of Health, Oswaldo Cruz Foundation, National Health Surveillance Agency, editors. Brasília: Ministry of Health, 2014.
34. World Health Organization, WHO Patient Safety. *WHO patient safety research : better knowledge for safer care*. Geneva: World Health Organization, 2009.

- 1
- 2
- 3 35. Fugulin F. [Sizing of nursing staff: evaluation of the staffing of hospitalization units of a
- 4 teaching hospital]. São Paulo: School of Nursing, University of São Paulo, 2002.
- 5
- 6 36. World Health Organization. *Conceptual framework for the international classification*
- 7 *for patient safety*. Geneva: World Health Organization, 2009.
- 8
- 9 37. Federal Nursing Council. [*Resolution COFEN N°293/2004*]. Rio de Janeiro: COFEN,
- 10 2004.
- 11
- 12 38. Charlson ME, Pompei P, Ales KL, MacKenzie CR. A new method of classifying
- 13 prognostic comorbidity in longitudinal studies: development and validation. *J Chronic Dis*
- 14 *1987;40(5):373-83*.
- 15
- 16 39. Huang YQ, Gou R, Diao YS, Yin QH, Fan WX, Liang YP, et al. Charlson comorbidity
- 17 index helps predict the risk of mortality for patients with type 2 diabetic nephropathy. *J Zhejiang*
- 18 *Univ Sci B* 2014;15(1):58-66.
- 19
- 20 40. Bates DW, Spell N, Cullen DJ, Burdick E, Laird N, Petersen LA, et al. The costs of
- 21 adverse drug events in hospitalized patients. *JAMA* 1997;277(4):307-11.
- 22
- 23 41. Bates DW, Cullen DJ, Laird N, Petersen LA, Small SD, Servi D, et al. Incidence of
- 24 adverse drug events and potential adverse drug events. Implications for prevention. *JAMA*
- 25 *1995;274(1):29-34*.
- 26
- 27 42. Strom BL, Kimmel SE, Hennessy S. *Pharmacoepidemiology*: Wiley, 2011.
- 28
- 29 43. Biswal S, Mishra P, Malhotra S, Puri GD, Pandhi P. Drug utilization pattern in the
- 30 intensive care unit of a tertiary care hospital. *J Clin Pharmacol* 2006;46(8):945-51.
- 31
- 32 44. Lima RE, De Bortoli Cassiani SH. Potential drug interactions in intensive care patients
- 33 at a teaching hospital. *Rev Lat Am Enfermagem* 2009;17(2):222-7.
- 34
- 35 45. Reis AM, de Carvalho RE, de Faria LM, et al. [Prevalence and clinical significance of
- 36 interactions drug-enteral nutrition in Intensive Care Units]. *Rev Bras Enferm* 2014;67(1):85-
- 37 90.
- 38
- 39 46. World Health Organization. *ATC/DDD index 2018*. Geneva: WHO, 2018.
- 40
- 41 47. Vonbach P, Dubied A, Krahenbuhl S, et al. Evaluation of frequently used drug
- 42 interaction screening programs. *Pharm World Sci* 2008;30(4):367-74.
- 43
- 44
- 45
- 46
- 47
- 48
- 49
- 50
- 51
- 52
- 53
- 54
- 55
- 56
- 57
- 58
- 59
- 60

# BMJ Open

## Nasogastric/Nasoenteric tube-related incidents in hospitalized patients: a study protocol of a multicenter prospective cohort study

|                                 |                                                                                                                                                                                                                                                                                                                                                                                                                                                                                                                                                                                                                                               |
|---------------------------------|-----------------------------------------------------------------------------------------------------------------------------------------------------------------------------------------------------------------------------------------------------------------------------------------------------------------------------------------------------------------------------------------------------------------------------------------------------------------------------------------------------------------------------------------------------------------------------------------------------------------------------------------------|
| Journal:                        | <i>BMJ Open</i>                                                                                                                                                                                                                                                                                                                                                                                                                                                                                                                                                                                                                               |
| Manuscript ID                   | bmjopen-2018-027967.R2                                                                                                                                                                                                                                                                                                                                                                                                                                                                                                                                                                                                                        |
| Article Type:                   | Protocol                                                                                                                                                                                                                                                                                                                                                                                                                                                                                                                                                                                                                                      |
| Date Submitted by the Author:   | 26-Jun-2019                                                                                                                                                                                                                                                                                                                                                                                                                                                                                                                                                                                                                                   |
| Complete List of Authors:       | Gimenes, Fernanda; University of São Paulo at Ribeirão Preto College of Nursing, General and Specialized Nursing<br>Pereira, Marta; University of São Paulo at Ribeirão Preto College of Nursing, General and Specialized Nursing<br>Prado, Patricia; Universidade Federal do Acre<br>Carvalho, Rhanna; Ceara State Univeristy<br>Koepp, Janine; Universidade de Santa Cruz do Sul<br>Freitas, Ligia; Faculty of Science and Technology of Campos Gerais<br>Teixeira, Thalyta; Universidade Paulista (UNIP), Nursing<br>Miasso, Adriana; University of São Paulo at Ribeirão Preto College of Nursing, Psychiatric Nursing and Human Sciences |
| <b>Primary Subject Heading</b>: | Health services research                                                                                                                                                                                                                                                                                                                                                                                                                                                                                                                                                                                                                      |
| Secondary Subject Heading:      | Epidemiology, Nursing                                                                                                                                                                                                                                                                                                                                                                                                                                                                                                                                                                                                                         |
| Keywords:                       | adverse effects, enteral nutrition, intubation, gastrointestinal, nasogastric intubation                                                                                                                                                                                                                                                                                                                                                                                                                                                                                                                                                      |
|                                 |                                                                                                                                                                                                                                                                                                                                                                                                                                                                                                                                                                                                                                               |

SCHOLARONE™  
Manuscripts

1  
2  
3 **Nasogastric/Nasoenteric tube-related incidents in hospitalized patients: a study**  
4 **protocol of a multicenter prospective cohort study**  
5

6 F R E Gimenes, <sup>1</sup> M C A Pereira, <sup>1</sup> P R Prado, <sup>2</sup> R E F L Carvalho, <sup>3</sup> J Koepp, <sup>4</sup> L M Freitas,  
7 <sup>5</sup> T C A Teixeira, <sup>6</sup> A I Miasso<sup>1</sup>  
8  
9

10  
11 **Author affiliations**

12 <sup>1</sup>University of São Paulo at Ribeirão Preto College of Nursing, WHO Collaborating Centre for  
13 Nursing Research Development, São Paulo, Brazil.

14 <sup>2</sup>Federal University of Acre, Acre, Brazil.

15 <sup>3</sup>Ceará State University, Ceará, Brazil.

16 <sup>4</sup>University of Santa Cruz do Sul, Rio Grande do Sul, Brazil.

17 <sup>5</sup>Faculty of Science and Technology of Campos Gerais (FACICA), Minas Gerais, Brazil.

18 <sup>6</sup>Paulista University (UNIP), Campinas, Brazil  
19  
20  
21  
22  
23  
24  
25

26 **Corresponding Author**

27 Fernanda R.E. Gimenes

28 Avenida Bandeirantes 3900, Monte Alegre, Ribeirão Preto, São Paulo, Brazil

29 Phone number: 55-16-3315-3420. Fax number: 55-16-3315-0518.

30 fregimenes@eerp.usp.br  
31  
32  
33  
34

35 **Keywords:** adverse effects; enteral nutrition; intubation, gastrointestinal; nasogastric  
36 intubation  
37

38 **Word count:** 4,202  
39  
40  
41  
42  
43  
44  
45  
46  
47  
48  
49  
50  
51  
52  
53  
54  
55  
56  
57  
58  
59  
60

## ABSTRACT

**Introduction:** Hospitalized patients with nasogastric/nasoenteric tube (NGT/NET) are at constant risk of incidents; therefore, healthcare professionals need to routinely monitor risks and adopt strategies for patient safety and quality of care.

**Aim:** To evaluate the NGT/NET related incidents in hospitalized patients and associated factors.

**Methods:** This is a multicenter study, with a multicenter prospective cohort design. Data will be collected at the general medical ward of seven Brazilian hospitals in the North, Northeast, Southeast, and South. The sample will consist of 391 patients that require a NGT/NET during hospitalization. Three different methods will be used to identify the incidents: (1) healthcare professionals and patients/caregivers will be required to report any NGT/NET related incidents; (2) researchers will visit the wards to get information about the incidents with healthcare professionals and patients/caregivers; (3) the researchers will review the medical records looking for information on the occurrence of any NGT/NET related incidents. Demographic, clinical and therapeutic details will be obtained from the medical records and will be registered in an electronic data collection tool developed for the purposes of this study. The complexity of patients will be assessed by the Patient Classification System, and the severity of comorbid diseases, through the Charlson Comorbidity Index.

**Implication for practice:** The results may encourage the use of evidence effectively to influence the scientific foundation for clinical practice and the development of evidence-based policies that will prevent, manage and eliminate complications caused by NGT/NET related incidents, and improve the quality and safety of care provided to hospitalized patients.

**Ethics and dissemination:** The study has been approved by the Research Ethics Committee. Detailed information about the study can be provided by the principal investigator. The findings will be reported through academic journals, seminar and conference presentations, social media, print media, the internet, and community/stakeholder engagement activities.

### Strengths and limitations of this study

- Several single-center studies have identified the prevalence of NGT/NET related incidents in general inpatients, however, there are no studies reporting on those incidents across multiple hospital sites and at a national level.
- A multicenter study may ascertain better generalizability of the data.
- To our knowledge, this is the first large scale study in Brazil and in Latin America documenting the incidence of NGT/NET related incidents in internal medicine wards.

- Although voluntary reporting can detect a broad range of incidents, this system misses the vast majority of incidents and cannot provide stable estimates of the true underlying causes.
- It is difficult to demonstrate causality between NGT/NET related incidents and negative patient outcomes due to a number of confounding factors.

For peer review only



## INTRODUCTION

During hospitalization, patients with advanced disease have caloric and protein malnutrition, and require nutritional and drug interventions. Therefore, these patients often need a nasogastric/nasoenteric tube (NGT/NET) to ensure that their daily nutritional and medical needs are met. <sup>1</sup> Data from the American Society for Enteral and Parenteral Nutrition (ASPEN) revealed that more than 245,000 patients per year require at least a temporary feeding tube during a hospital stay, along with another nearly 31,000 patients that are on enteral nutrition at home. <sup>2</sup> In the United States, about one million NGT/NET are introduced in adults and children each year <sup>3</sup> and the rate of complications is 2% to 36%. <sup>4-6</sup>

Although inserting a NGT/NET is a relatively innocuous procedure, improper positioning can cause severe and fatal complications. <sup>7-9</sup> One of the major incidents related to NGT/NET is the wrong connection. The design of these devices is such that it is possible to infuse enteral feeding and/or medications via an unwanted route, such as intravenous route. <sup>10,11</sup>

It is also common to have inadvertent positioning of the tube in the respiratory tract, resulting in bronchoaspiration and pneumothorax. <sup>8,12-14</sup> Pulmonary aspiration occurs in 2% to 10% of patients receiving enteral feeding. The inadvertent insertion of the tube into the tracheal tree results in discomfort for the patient, delayed feeding, increased morbidity and mortality, and length of hospital stay, resulting in added burdens for the institution and patients. <sup>5,15</sup> Therefore, health care professionals need to routinely monitor risks and adopt strategies aimed at patient safety.

Other incidents may occur during the insertion and/or progression of a NGT/NET through the gastrointestinal tract, such as sinusitis, vomiting, nasopharyngeal discomfort, erosion of the nasal septum, epistaxis, and blood return by the tube during guidewire withdrawal. <sup>16</sup> In Brazil, this data is not available, however, it is observed that NGT/NET are a common procedure in most Brazilian health institutions. <sup>17</sup>

Regarding medication administration, administering drugs with absorption at the intestinal level in patients using a NGT is a challenge. As demonstrated in the literature, some drugs should never be crushed and administered through a NGT because they have enteric or controlled release protection coatings. <sup>18</sup> The grinding process of these drugs can destroy the coating film and result in incidents, exposing patients to unnecessary risks. <sup>19</sup> In this regard, experts argue that healthcare professionals should not assume that a drug formulated to be administered orally can be administered safely through a NGT/NET because drug delivery mechanisms can be altered or destroyed, reducing effectiveness or increasing risk of toxicity.

<sup>20</sup>

In order to achieve adequate clinical outcomes in hospitalized patients, it is essential that medication and enteral nutrition be administered appropriately. However, nursing

1  
2  
3 guidelines on enteral feeding tube care are not based on scientific evidence, but on traditions,  
4 rituals and expert opinions, exposing patients to unnecessary harm.<sup>21</sup>  
5

6 Although NGT/NET related incidents are common in hospital settings with significant  
7 morbidity and mortality, the issue has not been extensively studied, especially in developing  
8 countries. Given that the number of patients with chronic conditions have increased  
9 significantly worldwide, as well as in Brazil, it is critical that health care professionals employ  
10 a repertoire of evidence based on interventions in order to provide safe and high quality care.  
11  
12  
13  
14  
15  
16  
17  
18  
19  
20  
21  
22  
23  
24  
25  
26  
27  
28  
29  
30  
31  
32  
33  
34  
35  
36  
37  
38  
39  
40  
41  
42  
43  
44  
45  
46  
47  
48  
49  
50  
51  
52  
53  
54  
55  
56  
57  
58  
59  
60

21 The results of the study will contribute to the production of knowledge and its  
22 application in clinical practice for harm reduction towards a safer environment for patient care;  
23 will provide national and international data that reflect the problem of NGT/NET related  
24 incidents in acute care units; and will contribute to the use of the evidence in an efficient way  
25 to influence the development of national practices and policies aimed at managing the risks  
26 associated with the NGT/NET.  
27  
28  
29  
30  
31  
32  
33  
34  
35  
36  
37  
38  
39  
40  
41  
42  
43  
44  
45  
46  
47  
48  
49  
50  
51  
52  
53  
54  
55  
56  
57  
58  
59  
60

### 31 **Significance and theoretical framework**

32 Feeding tubes may be used long-term (ie., gastrostomy or jejunostomy) or short-term with  
33 distal tips positioned in the stomach (ie., NGT) or small intestine (ie., NET).<sup>24</sup> Long-term  
34 feeding tubes are not part of the scope of this study and, therefore these enteral access  
35 devices will not be addressed.  
36  
37  
38  
39  
40  
41  
42  
43  
44  
45  
46  
47  
48  
49  
50  
51  
52  
53  
54  
55  
56  
57  
58  
59  
60

40 These devices are not exclusively used for administration of enteral nutrition. They are  
41 also frequently used for administering drugs. The consequence of this duo use is the increased  
42 risk of tube obstructions, physical-chemical incompatibilities, and potential drug-nutrient  
43 interactions.<sup>25</sup> In a previous study, researchers found that 74% of nurses employed wrong  
44 medication administration methods to deliver medicines through NGT/NET and those errors  
45 could reduce the effects of drugs and lead to unsuccessful treatments.<sup>26</sup>  
46  
47  
48  
49  
50  
51  
52  
53  
54  
55  
56  
57  
58  
59  
60

49 According to a study conducted in a Brazilian private hospital, the main reason for the  
50 loss of a NGT/NET was obstruction (36%) related to wrong medication preparation and  
51 administration techniques.<sup>27</sup> Estimates of incidence of clogged feeding tubes range widely  
52 from 12.5%-45%, but it is undisputed that they result in increased costs for patients and  
53 institutions.<sup>28</sup> Thus, health care practitioners, especially nurses, should not assume that a  
54 medication intended to be taken by mouth can be safely administered through a NGT/NET,  
55 because this misconception can result in harm to patients and increase medical costs to  
56 society.<sup>21</sup>  
57  
58  
59  
60

1  
2  
3  
4  
5  
6  
7  
8  
9  
10  
11  
12  
13  
14  
15  
16  
17  
18  
19  
20  
21  
22  
23  
24  
25  
26  
27  
28  
29  
30  
31  
32  
33  
34  
35  
36  
37  
38  
39  
40  
41  
42  
43  
44  
45  
46  
47  
48  
49  
50  
51  
52  
53  
54  
55  
56  
57  
58  
59  
60

Another incident related to improper medication administration via a NGT/NET is caused by drug-drug interactions in older people due to polypharmacy, with a prevalence of 20-40%. Polypharmacy increases the complexity of clinical management and contributes to medication adverse events.<sup>29</sup>

Therefore, the causes of the incidents are multifaceted and the consequences are associated with increasing complexity of patients and treatments, intensifying the need for measures aimed at improving the quality of care. For this reason, opportunities to share knowledge are fundamental to patient safety.<sup>30</sup>

Efforts to overcome these problems have resulted in the development of international programs and policies. For instance, the WHO proposed the patient safety research cycle and the first step in improving care quality and safety is to measure the occurrence of incidents in order to know the magnitude of the problem. The WHO then suggests understanding the causes and identifying solutions.<sup>31</sup>

In Brazil, the Ministry of Health and the National Health Surveillance Agency (ANVISA), in line with WHO's global initiatives, launched the National Patient Safety Program in mid-April 2013 with the aim of promoting strategies aimed at prevention and reduction of risks associated with health care. Among the strategies were increasing patient safety research.<sup>32,33</sup>

The present study is necessary when considering the fact that patient safety is a global problem affecting countries at all levels of development;<sup>34</sup> the production of knowledge and its application in clinical practice can promote a safe environment for the provision of care, and in Brazil, there is concern about the need to increase knowledge on this issue and there are insufficient national data that reflect the problem of the incidents related to NGT/NET in hospitalized patients. We expect that the results of this study will provide high quality evidence that will support interventions designed to improve patient safety.

The objective of this study is to evaluate the NGT/NET related incidents in hospitalized patients and associated factors. The secondary objectives are:

1. To analyse the association between the NGT/NET related incidents and the complexity of the patients;
2. To analyze the association between the NGT/NET related incidents and the severity of comorbid diseases;
3. To examine the predictive role of Charlson Comorbidity Index (CCI) on mortality of patients with a NGT/NET;
4. To assess potential drug-drug interactions (pDDI) in patients with a NGT/NET and its association with patient complexity and comorbid diseases.

## METHODS

## Research Design

This is a multicenter study, with a prospective cohort design.

## Setting

Seven centers across Brazil will participate in this study; the centers include a mix of community and university hospitals, hospitals with and without residency programs, and public and private hospitals; they also vary in size. The hospitals will be as follows: Acre Hospital of Clinics - HCA, General Hospital of Fortaleza - HGF, Hospital of Clinics of the Medical School of Ribeirão Preto of the University of São Paulo - HCFMRP-USP, Américo Brasiliense State Hospital - HEAB, Sumaré State Hospital - HES, São Vicente de Paulo Hospital - HSVP, and Santa Cruz Hospital - HSCRGS.

The medical wards of these hospitals were chosen for this study because many adult patients in these wards have chronic conditions and require enteral nutrition and medications through a NGT/NET.

## Subjects

The study population will be the patients admitted to the medical ward of the seven Brazilian hospitals that require a feeding tube during hospitalization. The inclusion criteria are: patients older than 18 years; who are admitted to the medical ward with a short-term feeding tube (NGT or NET); patients who required the insertion of a NGT/NET; and patients that have been hospitalized for at least 24 hours. Patients meeting the above inclusion criteria who are re-admitted during the study period will be only counted for their first admission.

Sampling size was determined by a stratified random sampling with proportional allocation by strata, where each stratum is formed by the floors / units of each hospital (Table 1):

**Table 1.** Determination of sample size, 2018

| Hospital / Strata | Number of inpatients | Prevalence of patients with NGT/NET | Estimated size of each stratum |
|-------------------|----------------------|-------------------------------------|--------------------------------|
| HCA               | 980                  | 0.1908                              | 58                             |
| HGF               | 192                  | 0.1563                              | 11                             |
| HCFMRP-USP        | 2247                 | 0.0788                              | 134                            |
| HEAB              | 783                  | 0.1073                              | 47                             |
| HES               | 1991                 | 0.1828                              | 119                            |
| HSVP              | 323                  | 0.0650                              | 19                             |
| HSCRGS            | 48                   | 0.0324                              | 3                              |

The formula for the calculation of the sample size is given by:

$$n = \frac{z_{\alpha/2}^2 N(1-P)}{\varepsilon^2 P(N-1) + z_{\alpha/2}^2 (1-P)} \quad (1)$$

,where P represents the prevalence of the event of interest

(column 4 of table 1),  $z_{\alpha/2}$  represents the level of significance adopted and  $\varepsilon$  is the relative sampling error. If the sample size calculated by the expression given in (1) is greater than 20% of the population the following finite correction procedure is adopted:

$$nc = \frac{n}{(1 + n/N)} \quad (2)$$

where N is the total size of the study population and n is the value obtained

in (1). The sample was allocated proportionally among the H strata according to the formula:

$$n_h = n \frac{N_h}{N}$$

, where N is the total population of hospitalized patients (N = 6,564), and  $N_h$  is the total of each stratum H. Population totals are found in the second column of Table 1. Adopting the parameters of relative error of 20%, level of significance of 5% and the total population of 6,564, a total sample size of 391 patients was calculated. The required sample sizes of each strata are found in the last column of Table 1.

## Instruments

Data collection tools will be composed of three virtual forms which will be developed by the research team and assessed for face and content validity by a panel of experts. The forms will be developed in Portuguese and an online platform (Survey Monkey®) will be used.

The experts will be selected through the analysis of existing curricula in the database of the Brazilian National Council for Scientific and Technological Development (CNPq) and will be invited to participate in the study, by invitation letter sent by electronic mail. Then the access links to the electronic forms will be made available for the experts to carry out their analysis; the experts will have up to 30 days to evaluate the electronic forms and give their feedback to the researchers. The modified forms will be tested through a pre-test, where the forms will be applied to five hospitalized patients from the first day of use of a NGT/NET until patient discharge.

At admission, demographic, clinical, and therapeutic information will be recorded in the first electronic data collection form, including:

- ✓ *Demographic data*: registration number; date of admission to the ward / unit; date of birth; city / state of origin; gender; race; marital status; education level; profession; origin of the referral.

- 1  
2  
3 ✓ *Clinical data*: principal and secondary International Classification of Diseases (ICD);  
4 comorbidities; the final score of the Patient Classification System (PCS); <sup>35</sup> level of  
5 consciousness measured by Glasgow Coma Scale (GCS).  
6  
7  
8 ✓ *Therapeutic data*: data related to the NGT/NET (time to insertion; type; gauge; location  
9 [gastric or small-bowel]; methods used to confirm feeding tube placement and the  
10 results of the methods used); data related to the enteral nutrition (type, total volume in  
11 24 hours, frequency of administration); data related to the medications prescribed  
12 (drug name; dosage form; dose; route of administration; frequency of administration;  
13 and planned / scheduled administration time).  
14  
15

16  
17 The second electronic data collection form will include variables related to the  
18 incidents:  
19

- 20  
21 ✓ *Incident*: date and time of occurrence; type of incident (mechanic; gastrointestinal;  
22 infectious; and others); <sup>4</sup> consequence of the incident for the patient, according to the  
23 WHO (none; mild; moderate; severe; and fatal); <sup>36</sup> measures adopted after the  
24 incident; sources of information on the occurrence of the incident; and means of  
25 obtaining information about the incident.  
26  
27  
28 ✓ *Clinical*: principal and secondary ICD; comorbidities; the final score of the PCS; <sup>35</sup> level  
29 of consciousness measured by GCS.  
30  
31 ✓ *Therapeutic*: data related to the enteral nutrition (type, total volume in 24 hours,  
32 frequency of administration); data related to the medications prescribed (drug name;  
33 dosage form; dose; route of administration; frequency of administration; and planned  
34 / scheduled administration time).  
35  
36  
37

38 The third electronic data collection form will include variables related to the start of  
39 feeding tube and patient follow-up:  
40

- 41 ✓ *Clinical*: date of the start of the feeding tube use; principal and secondary ICD;  
42 comorbidities; the final score of the PCS; <sup>35</sup> level of consciousness measured by GCS.  
43  
44 ✓ *Therapeutic*: data related to the medications prescribed 24 hours after feeding tube  
45 insertion (or 24 hours after admission if the patient is admitted at the unit with a  
46 NGT/NET); medications prescribed 120 hours after feeding tube insertion (or 120  
47 hours after admission if the patient is admitted at the unit with a NGT/NET); and  
48 medications prescribed 24 hours before patient discharge.  
49  
50  
51 ✓ Date of programmed feeding tube removal and the main reason; date and time of  
52 patient discharge; reason for patient discharge.  
53  
54  
55  
56

## 57 Procedures

58 Data collection started on February 2019 and will be completed in 24 months. At each center,  
59 a registered nurse in the medical ward and a research assistant will serve as a liaison to the  
60

1  
2  
3 study investigators; a designated nurse coordinator will ensure that the collection of data will  
4 be carried out completely and correctly. The liaison nurse and the research assistant at each  
5 center will attend a total of 16 hours of theoretical and practical formal training sessions led by  
6 the regional study coordinator, at which the overall study design will be presented and each  
7 electronic data collection forms will be explained. The study protocol will neither mandate nor  
8 direct any element of patient care, and thus will pose no risk to patients.  
9

10  
11  
12 A data collection guideline will be developed with the purpose of standardizing data  
13 recording in the seven hospitals participating in the study. This guideline will consist of general  
14 information related to the research project; general instructions on how to access the  
15 electronic data collection forms using mobile devices; definition of each variable and additional  
16 information for completing the variables that make up the three electronic data collection  
17 forms. The guideline will be available on printed version and by e-mail to assist all the research  
18 team on data collection.  
19

20  
21  
22 Before data collection starts, the researchers will identify the patients who will start the  
23 use of a NGT/NET during hospitalization, according to the inclusion criteria proposed for this  
24 study. In Brazilian hospitals, NGT/NET are inserted by registered nurses.  
25

26  
27  
28 Researchers will explain the research objectives and will ask patients, or their legal  
29 guardians, to voluntarily sign the Informed Consent Form.  
30

31  
32  
33 For purposes of confidentiality, each patient will be identified by a unique identifying  
34 number; data will be collected from the moment a patient starts using a NGT/NET until the  
35 patient is discharged (due to death or non-death).  
36

37  
38  
39 Using a mobile device, research assistants will collect demographic data at patient  
40 admission, and prospectively record clinical and therapeutic data from the patients' medical  
41 record. Considering that four hospitals participating in this study have present electronic  
42 medical records, these will be accessed in the computers available in the medical wards /  
43 units. In both situations, the researchers will request permission from the nurse responsible  
44 for the unit to access the computers, and to record the information in the electronic data  
45 collection forms. The consultation of the medical records will occur in the afternoon or at night,  
46 because these are the periods with the least movement of people.  
47  
48  
49

#### 50 *Assessment of the complexity of patients with NGT/NET*

51  
52 Patient complexity will be assessed by an experienced nurse, member of the research team,  
53 on the first day of feeding tube use, on the day of the incident, and weekly until patient  
54 discharges. Nurses will have up to 24 hours to complete their evaluation.  
55

56  
57 For this purpose, the PCS proposed by Fugulin<sup>35</sup> will be used. The PCS is  
58 recommended by the Federal Nursing Council, Brazil,<sup>37</sup> and it was developed to classify  
59 patients according to the degree of dependence of the nursing team. This instrument has nine  
60

1  
2  
3 critical indicators: mental state, oxygenation, vital signs, motility, ambulation, feeding, body  
4 care, elimination and therapeutics. Therefore, the scores are distributed in five categories that  
5 correspond to the complexity of the assistance: minimum care (scores of 9-14), intermediate  
6 care (scores of 15-20), high-dependency (scores of 21-26), semi-intensive (scores of 27-31),  
7 and intensive care (scores > 31).  
8  
9  
10

### 11 *Assessment of the severity of comorbid diseases of patients with NGT/NET*

12 Regarding the severity of comorbid diseases, this will be evaluated on admission at the  
13 medical ward / unit; on the first day of use of the short-term feeding tube; on the day of the  
14 incident; and weekly until patient discharges. For this purpose, the Charlson Comorbidity Index  
15 (CCI)<sup>38</sup> will be used. The CCI is the most widely used comorbidity, which is a method of  
16 categorizing patients' comorbidities, according to the ICD. The aim of the CCI is to measure  
17 the severity of the patient, regardless of the main diagnosis, and therefore, to predict the one-  
18 year mortality of patients. The final score is the result of the sum of the weights assigned to  
19 the comorbidities recorded as secondary diagnoses; the higher the score, the greater the risk  
20 of the patient dying. It should be noted that the CCI will be adjusted according to the patient's  
21 age, so that, from the age of 50, a point will be added to the final score for every decade of  
22 life.<sup>38</sup>  
23  
24  
25  
26  
27  
28  
29  
30

31 Based on the final CCI score, patients will be divided into three groups: mild (with CCI  
32 scores of 1–2); moderate (with CCI scores of 3–4); and severe (with CCI scores ≥5). In  
33 addition, survival time in days will be calculated from the first day patient start using a feeding  
34 tube during hospital stay to the death of a patient.<sup>39</sup>  
35  
36  
37  
38

### 39 *Assessment of the NGT/NET related incidents*

40 In this study, incident was defined as an event or circumstance that could have resulted, or  
41 did result, in unnecessary harm to a patient.<sup>36</sup> The NGT/NET related incidents considered in  
42 this study are:  
43  
44

- 45 ✓ Mechanical incident (unplanned / accidental removal; obstruction; displacement /  
46 migration; epistaxis; nasal mucosa edema; perforation or stenosis of the esophagus;  
47 perforation of the brain; pneumothorax; various attempts to introduce the tube).
- 48 ✓ Gastrointestinal incident (nausea / vomiting; diarrhea; constipation; colic / abdominal  
49 distension / flatulence).
- 50 ✓ Infection (aspiration pneumonia; gastroenterocolitis).
- 51 ✓ Other incidents (skin lesion associated with the NGT/NET insertion;  
52 bronchoaspiration; wrong connection; quality of the tube material).

53  
54  
55 Based on previous studies,<sup>40,41</sup> three methods will be used for incidents detection:  
56  
57  
58  
59  
60



- 1  
2  
3 (1) Prompted spontaneous reporting: healthcare professionals (nursing and medical staff)  
4 and patients / caregivers will be continuously prompted to report any NGT/NET related  
5 incidents to the investigators. A pen and a booklet containing instructions on incident  
6 reporting will be available and remain at the bedside of each patient participating in the  
7 study;  
8  
9
- 10  
11 (2) Researchers will visit the wards / units at least twice a week to request information  
12 about the incidents, along with healthcare professionals (nursing and medical staff)  
13 and patients / caregivers;  
14
- 15  
16 (3) Researchers will review the booklet and medical records at least twice a week to obtain  
17 information about NGT/NET related incident.  
18

19 Using a mobile device, the research assistant will record data related to the incidents  
20 in the electronic data collection form developed for this purpose. More than one incident may  
21 occur on the same day and/or at the same time (eg. tube obstruction and unplanned removal),  
22 thus each incident will be recorded on a different form, resulting in a form filled for each  
23 incident.  
24  
25  
26  
27

### 28 *Assessment of potential drug-drug interactions in patients with NGT/NET*

29 Regarding the analysis of potential drug-drug interactions, it will be performed only in patients  
30 with a hospital stay of at least five days, because longer hospital stays are associated with the  
31 likelihood of adverse drug events.<sup>42</sup>  
32  
33

34 The research assistants will record on electronic data collection forms all medications  
35 and enteral nutrition prescribed for patients, regardless of whether they were administered or  
36 not. Data related to the medications will be collected in the following moments of  
37 hospitalization: at admission; 24 hours and 120 hours after admission because it is the period  
38 of greatest therapeutic adjustment<sup>43-45</sup>. Data related to medications will also be recorded 24  
39 hours before patient discharge and on the day of the incident. Data related to enteral nutrition  
40 will be recorded on admission and on the day of the incident.  
41  
42  
43  
44  
45

46 Medications will be classified according to the WHO Chemical Anatomical Therapeutic  
47 Classification (ATC),<sup>46</sup> and the analysis of drug interactions will be performed based on drug  
48 monographs from the Drug Reax System database from Thomson Healthcare® because it is  
49 a highly reliable software.<sup>47</sup> The software is also available in the journal portal of the  
50 Coordination of Improvement of Higher-Level Personnel - CAPES, Brazil. Potential drug-drug  
51 interactions will be classified according to the speed of action, documentation and severity, as  
52 recommended by Drug Reax®.  
53  
54  
55  
56  
57

### 58 **Data analysis**

1  
2  
3 Data will be downloaded from the Survey Monkey® to a computer file and analyzed using the  
4 Statistical Package for the Social Program Sciences® (SPSS) version 25.0. In the statistical  
5 analysis, we will apply: calculation of proportions and measures of central tendency and  
6 variability. Quantitative variables will be assessed for normal distribution using the  
7 Kolmogorov-Smirnov test. The importance of the normal distribution evaluation is justified,  
8 among others, by the subsequent indication of parametric and non-parametric statistical tests.  
9 Pearson's Chi-square ( $\chi^2$ ) and Fisher's exact tests will be used to compare the response  
10 variables with the categorical explanatory variables, when indicated. For the comparison of  
11 the variable responses with the quantitative explanatory variables, t or Mann-Whitney tests  
12 will be performed, when indicated.

13  
14 To examine the predictive role of Charlson Comorbidity Index (CCI) on mortality of  
15 patients having a NGT/NET, a one-way analysis of variance (ANOVA) will be used to compare  
16 group differences stratified by CCI, and otherwise Chi-square tests will be applied. All analysis  
17 will be carried out considering a significance level of 5% ( $\alpha= 0,05$ ).

### 26 27 **Patient and Public Involvement**

28 Patients were not involved in the setting of the research questions or the outcome measures.  
29 However, we have specific plans to disseminate the results of the research to the patient  
30 community through social media (ie, Facebook, Twitter), print media (ie,. Patient Safety Alert),  
31 the internet (ie, links to study reports on the Patient Safety Research Group website), and  
32 community/stakeholder engagement activities (ie, community forums, stakeholder meetings).

### 36 37 **Ethics and Dissemination**

38 The study was approved by the Research Ethics Committee of the University of São Paulo at  
39 Ribeirão Preto College of Nursing, according to the Resolution No. 466/2012, of the National  
40 Council of Ethics in Research of the Brazilian Ministry of Health, which addresses research  
41 ethics with humans (CAAE: 56166016.1001.5393). Written informed consent will be obtained  
42 from each patient, or their guardian, prior to enrollment in the study. Participants will be  
43 informed of the project aims and asked to voluntarily sign the consent form. They will be  
44 informed of possible risks which are: discomfort or embarrassment when answering questions  
45 about NGT/NET related incidents, thus participants will be able to refuse to answer any  
46 question that he/she feels inconvenient or inappropriate, without causing harm to their care.  
47 No personally identifiable information will be collected in order to maintain the anonymity of  
48 the participants and they will be informed that the results will be used for possible publications.

49 The results will be reported to the hospitals and the findings may contribute to the  
50 hospital's policies and procedures to reduce the risks for NGT/NET related incidents and to  
51 improve the quality of care and patient safety. There is very little information about NGT/NET

1  
2  
3 related incidents in developing countries, so this study will provide important information about  
4 risk levels. Results will also be reported through academic journals and conference  
5 presentations, social media (ie, Facebook, Twitter), print media (ie, Patient Safety Alert), the  
6 internet (ie, links to study reports on the Patient Safety Research Group website), and  
7 community/stakeholder engagement activities (ie, community forums, stakeholder meetings).  
8 The project team includes academic researchers, hospital clinicians and experts involved in  
9 patient safety. This provides the project with access to a range of other conduits through which  
10 to disseminate results to, for example, policymakers and system implementers.  
11  
12  
13  
14  
15  
16

### 17 **Funding**

18 This research received no specific grant from any funding agency in the public, commercial or  
19 not-for-profit sectors.  
20  
21  
22

### 23 **Competing interests**

24 None declared.  
25  
26  
27

### 28 **Patient Consent**

29 Obtained.  
30  
31  
32

### 33 **Ethics approval**

34 The study was approved by the Research Ethics Committee of the University of São Paulo at  
35 Ribeirão Preto College of Nursing (CAAE: 56166016.1001.5393).  
36  
37  
38  
39

### 40 **Provenance and peer review**

41 Not commissioned; externally peer reviewed.  
42  
43  
44

45 **Contributorship statement:** FREG and MCAP initiated the project and are the chief  
46 investigators on the project; they made substantial contributions to the conception and design  
47 of the work. PRP, REFLC, JK, LMF, TCAT, and AIM, are associate investigators and all made  
48 significant contributions to the protocol in their specific areas of expertise. FREG prepared the  
49 first draft of this protocol and all authors have reviewed, provided input and gave final approval  
50 of the version published.  
51  
52  
53  
54

### 55 **References**

56  
57 1. Gimenes FRE, Anacleto TA. [*Medication preparation and administration through*  
58 *feeding tubes and ostomy*] [press release]. Belo Horizonte: Boletim ISMP Brasil, 2015.  
59  
60

2. Grant M, Martin S. *Delivery of enteral nutrition*. Advanced Practice in Acute & Critical Care: AACN Clinical Issues, 2000.
3. Krenitsky J. Blind bedside placement of feeding tubes: treatment or threat? . *Practical Gastroenterology* 2011;32-42.
4. Blumenstein I, Shastri YM, Stein J. Gastroenteric tube feeding: techniques, problems and solutions. *World J Gastroenterol* 2014;20(26):8505-24.
5. Figueredo LP. [*Complications of enteral nutritional therapy (NER) and associated factors in hospitalized patients*]. São Paulo: Universidade de São Paulo, 2011.
6. Stayner JL, Bhatnagar A, McGinn AN, Fang JC. Feeding tube placement: errors and complications. *Nutr Clin Pract* 2012;27(6):738-48.
7. American Association of Critical-Care Nurses. *AACH practice alert: verification of feeding tube placement* [press release]. Aliso Viejo (CA): AACN, 2009.
8. Amirlak B, Amirlak I, Awad Z, Zahmatkesh M, Pipinos I, Forse A. Pneumothorax following feeding tube placement: precaution and treatment. *Acta Med Iran* 2012;50(5):355-8.
9. Arnau Alfonso JJ. [Methods for determining the correct location of a nasogastric tube after its insertion in adults patients]. *Enferm Clin* 2013;23(2):81-3.
10. Sorokin R, Gottlieb JE. Enhancing patient safety during feeding-tube insertion: a review of more than 2,000 insertions. *J Parenter Enteral Nutr* 2006;30(5):440-5.
11. Millin CJ, Brooks M. Reduce--and report--enteral feeding tube misconnections. *Nursing* 2010;40(11):59-60.
12. Metheny NA, Meert KL, Clouse RE. Complications related to feeding tube placement. *Curr Opin Gastroenterol* 2007;23(2):178-82.
13. Waitzberg D, Enck C, Miyahira N, Mourão J, Faim M, Oliseski M, et al. [*Nutrition Therapy: quality indicators*]. São Paulo: Project Guidelines; Brazilian Medical Association; Federal Council of Medicine, 2011.
14. Pillai JB, Vegas A, Brister S. Thoracic complications of nasogastric tube: review of safe practice. *Interac Cardiovasc Thorac Surg* 2005;4(5):429-33.
15. Gilbert RT, Burns SM. Increasing the safety of blind gastric tube placement in pediatric patients: the design and testing of a procedure using a carbon dioxide detection device. *J Pediatr Nurs* 2012;27(5):528-32.
16. Kuo YW, Yen M, Fetzer S, Lee JD. Reducing the pain of nasogastric tube intubation with nebulized and atomized lidocaine: a systematic review and meta-analysis. *J Pain Symptom Manage* 2010;40(4):613-20.
17. Ferreira AM. [Nasogastric and nasoenteric feeding tubes: how may the discomfort during placement be reduced?]. *Rev Esc Enferm USP* 2005;39:358-9.
18. Mitchell JF. *Oral dosage forms that should not be crushed*. Institute for Safe Medication Practices – ISMP, 2014.

19. van den Bemt P, Cusell MBI, Overbeeke PW, Trommelen M, van Dooren D, Ophorst WR, et al. Quality improvement of oral medication administration in patients with enteral feeding tubes. *Qual Saf Health Care* 2006;15(1):44-7.
20. Grissinger M. Preventing errors when drugs are given via enteral feeding tubes. *P t* 2013;38(10):575-6.
21. Simons SR, Abdallah LM. Bedside Assessment of enteral tube placement: aligning practice with evidence. *Am J Nurs* 2012;112(2):40-6.
22. Brazil. [Strategic actions plan for coping with chronic noncommunicable diseases (CNCD) in Brazil 2011-2022]. Brasília: Ministry of Health, Secretariat of Health Surveillance, Department of Health Situation Analysis, 2011.
23. World Health Organization. *Global status report on noncommunicable diseases 2014*. Geneva: World Health Organization, 2014.
24. Lord LM. Enteral access devices: types, function, care, and challenges. *Nutr Clin Pract* 2018;33(1):16-38.
25. Heydrich J, Heineck I, Bueno D. Observation of preparation and administration of drugs by nursing assistants in patients with enteral feeding tube. *Braz J Pharm Sci* 2009;45:117-20.
26. Emami S, Hamishehkar H, Mahmoodpoor A, et al. Errors of oral medication administration in a patient with enteral feeding tube. *J Res Pharm Pract* 2012;1(1):37-40.
27. Pereira SRM, Coelho MJ, Mesquita AMFd, et al. Causes for the unplanned removal of the feeding tube in intensive care. *Acta Paul Enf* 2013;26:338-44.
28. Fisher C, Blalock B. *Clogged feeding tubes: a clinician's thorn*. In: Parrish CR, editor. *Practical Gastroenterology* 2014.
29. Palleria C, Di Paolo A, Giorè C, et al. Pharmacokinetic drug-drug interaction and their implication in clinical management. *J Res Med Sci* 2013;18(7):601-10.
30. Hoffmann B, Beyer M, Rohe J, et al. "Every error counts": a web-based incident reporting and learning system for general practice. *Qual Saf Health Care* 2008;17(4):307-12.
31. World Health Organization. *Patient safety research: a guide for developing training programmes*. Geneva: WHO, 2012.
32. Brazil. [Ordinance No. 529, of April 1, 2013. Establishes the National Patient Safety Program (PNSP)]. Brasília, DF: Diário Oficial da União, 2013.
33. Brazil. [Reference Document for the National Patient Safety Program]. In: Ministry of Health, Oswaldo Cruz Foundation, National Health Surveillance Agency, editors. Brasília: Ministry of Health, 2014.
34. World Health Organization, WHO Patient Safety. *WHO patient safety research : better knowledge for safer care*. Geneva: World Health Organization, 2009.

- 1
- 2
- 3 35. Fugulin F. [Sizing of nursing staff: evaluation of the staffing of hospitalization units of a
- 4 teaching hospital]. São Paulo: School of Nursing, University of São Paulo, 2002.
- 5
- 6 36. World Health Organization. *Conceptual framework for the international classification*
- 7 *for patient safety*. Geneva: World Health Organization, 2009.
- 8
- 9 37. Federal Nursing Council. [*Resolution COFEN N°293/2004*]. Rio de Janeiro: COFEN,
- 10 2004.
- 11
- 12 38. Charlson ME, Pompei P, Ales KL, MacKenzie CR. A new method of classifying
- 13 prognostic comorbidity in longitudinal studies: development and validation. *J Chronic Dis*
- 14 *1987;40(5):373-83*.
- 15
- 16 39. Huang YQ, Gou R, Diao YS, Yin QH, Fan WX, Liang YP, et al. Charlson comorbidity
- 17 index helps predict the risk of mortality for patients with type 2 diabetic nephropathy. *J Zhejiang*
- 18 *Univ Sci B* 2014;15(1):58-66.
- 19
- 20 40. Bates DW, Spell N, Cullen DJ, Burdick E, Laird N, Petersen LA, et al. The costs of
- 21 adverse drug events in hospitalized patients. *JAMA* 1997;277(4):307-11.
- 22
- 23 41. Bates DW, Cullen DJ, Laird N, Petersen LA, Small SD, Servi D, et al. Incidence of
- 24 adverse drug events and potential adverse drug events. Implications for prevention. *JAMA*
- 25 *1995;274(1):29-34*.
- 26
- 27 42. Strom BL, Kimmel SE, Hennessy S. *Pharmacoepidemiology*: Wiley, 2011.
- 28
- 29 43. Biswal S, Mishra P, Malhotra S, Puri GD, Pandhi P. Drug utilization pattern in the
- 30 intensive care unit of a tertiary care hospital. *J Clin Pharmacol* 2006;46(8):945-51.
- 31
- 32 44. Lima RE, De Bortoli Cassiani SH. Potential drug interactions in intensive care patients
- 33 at a teaching hospital. *Rev Lat Am Enfermagem* 2009;17(2):222-7.
- 34
- 35 45. Reis AM, de Carvalho RE, de Faria LM, et al. [Prevalence and clinical significance of
- 36 interactions drug-enteral nutrition in Intensive Care Units]. *Rev Bras Enferm* 2014;67(1):85-
- 37 90.
- 38
- 39 46. World Health Organization. ATC/DDD index 2018. Geneva: WHO, 2018.
- 40
- 41 47. Vonbach P, Dubied A, Krahenbuhl S, et al. Evaluation of frequently used drug
- 42 interaction screening programs. *Pharm World Sci* 2008;30(4):367-74.
- 43
- 44
- 45
- 46
- 47
- 48
- 49
- 50
- 51
- 52
- 53
- 54
- 55
- 56
- 57
- 58
- 59
- 60
